# Supplementary material for: Amino acid ionic liquids as catalysts in a solvent-free Morita–Baylis–Hillman reaction
Source: Royal Society of Chemistry journal article supplement (doi:10.1039/c8ra02409j), 2018-01-01
Supplement: c8ra02409j1.pdf [file c8ra02409j1.pdf]

## Electronic Supplementary Information

### **Amino acid ionic liquids as catalysts in a solvent-free Morita–Baylis–Hillman reaction**

Mathias Prado Pereira,<sup>a</sup> Rafaela de Souza Martins<sup>a</sup>, Marcone Augusto Leal de Oliveira<sup>a</sup>  
and Fernanda Irene Bombonato<sup>\*a</sup>

Nucleus of studies in organic synthesis and catalysis, Department of Chemistry,  
University of Juiz de Fora, São Pedro 36036-900, Juiz de Fora, Brazil.

*fernanda.bombonato@ufff.edu.br*

### **Table of contents**

1. <sup>1</sup>H and <sup>13</sup>C NMR spectra of intermediate compounds (S1)
2. <sup>1</sup>H and <sup>13</sup>C NMR spectra of amino acid ionic liquids (S4)
3. <sup>1</sup>H and <sup>13</sup>C NMR spectra of Morita-Baylis-Hillman compounds (S14)
4. <sup>1</sup>H NMR spectra of recycle experiments of amino acid ionic liquid **4c** (S26)
5. <sup>1</sup>H NMR spectra of recycle experiments of amino acid ionic liquid **4d** (S27)
5. ESI(-)/MS spectra of recycle experiments of amino acid ionic liquid **4d** (S27)

# <sup>1</sup>H and <sup>13</sup>C NMR spectra compounds.

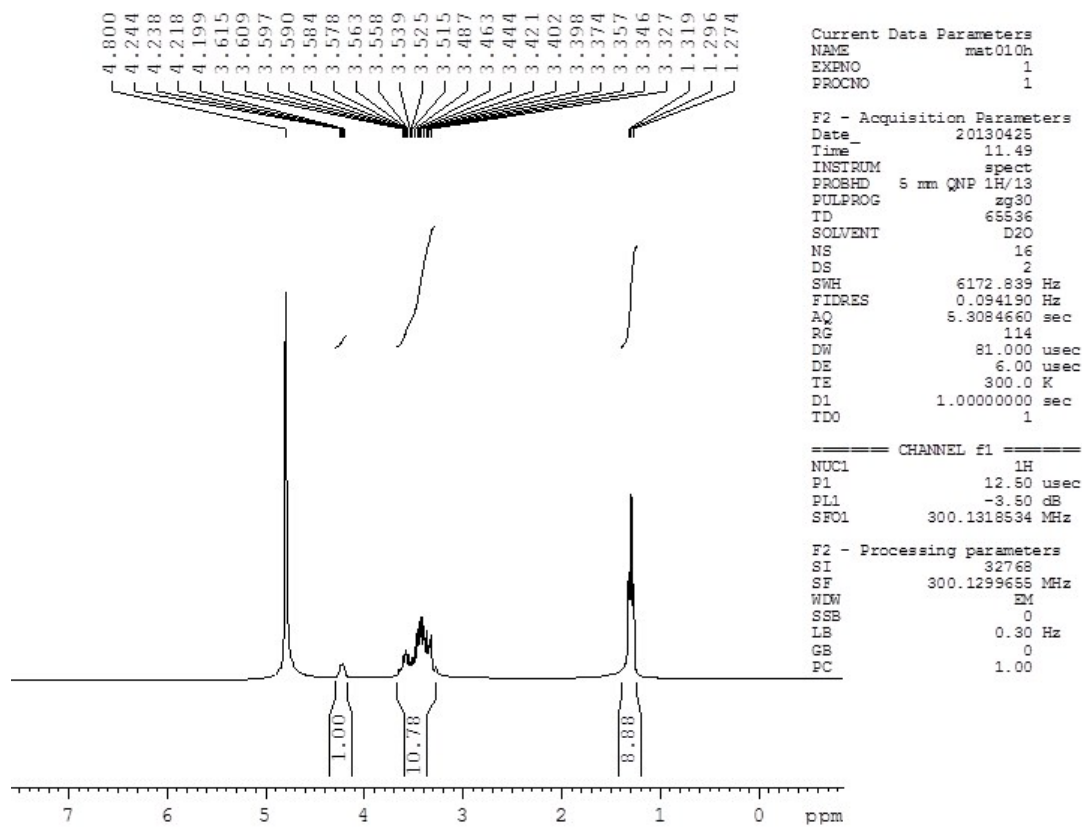

<sup>1</sup>H NMR of **2** (300 MHz, D<sub>2</sub>O)

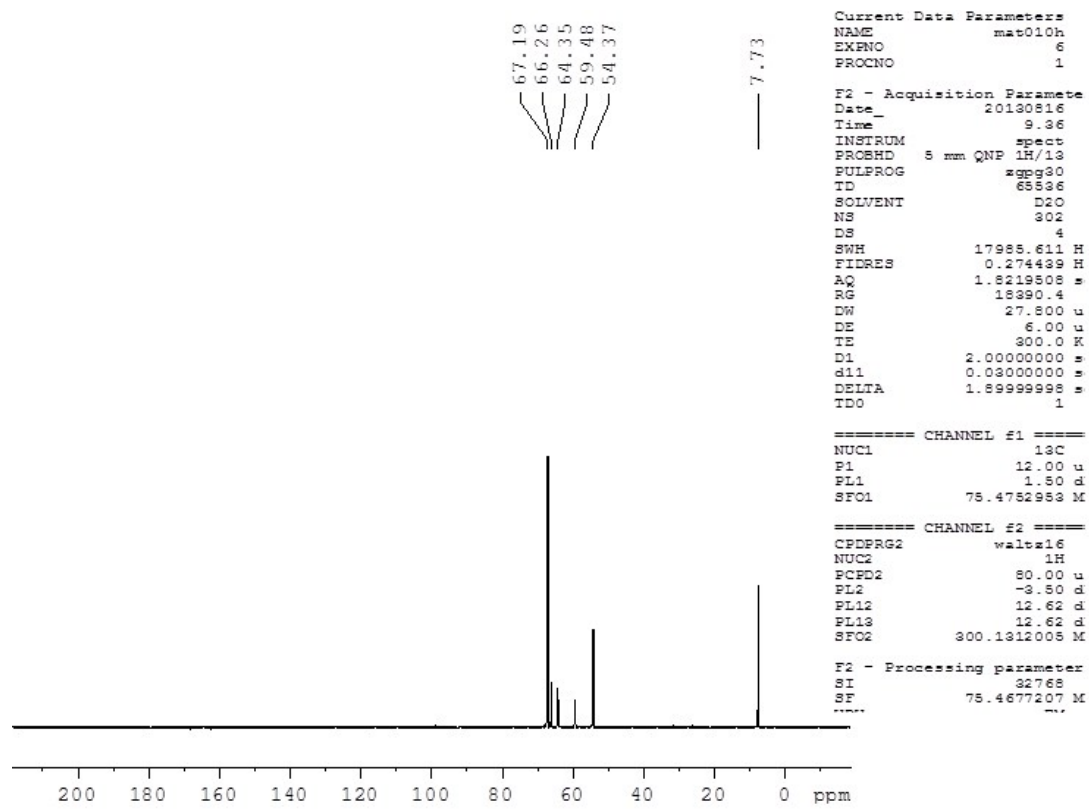

<sup>13</sup>C NMR of 2 (75 MHz, D<sub>2</sub>O)

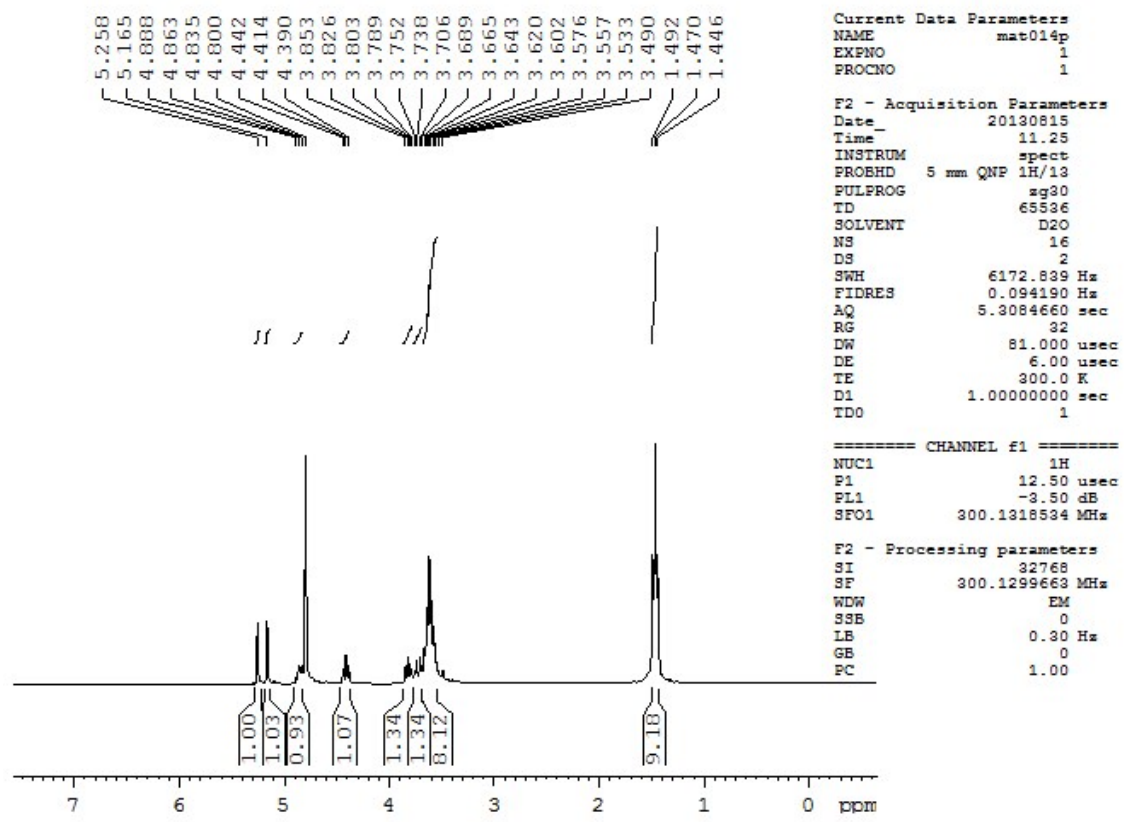

### $^1\text{H}$ NMR of **3** (300 MHz, $\text{D}_2\text{O}$ )

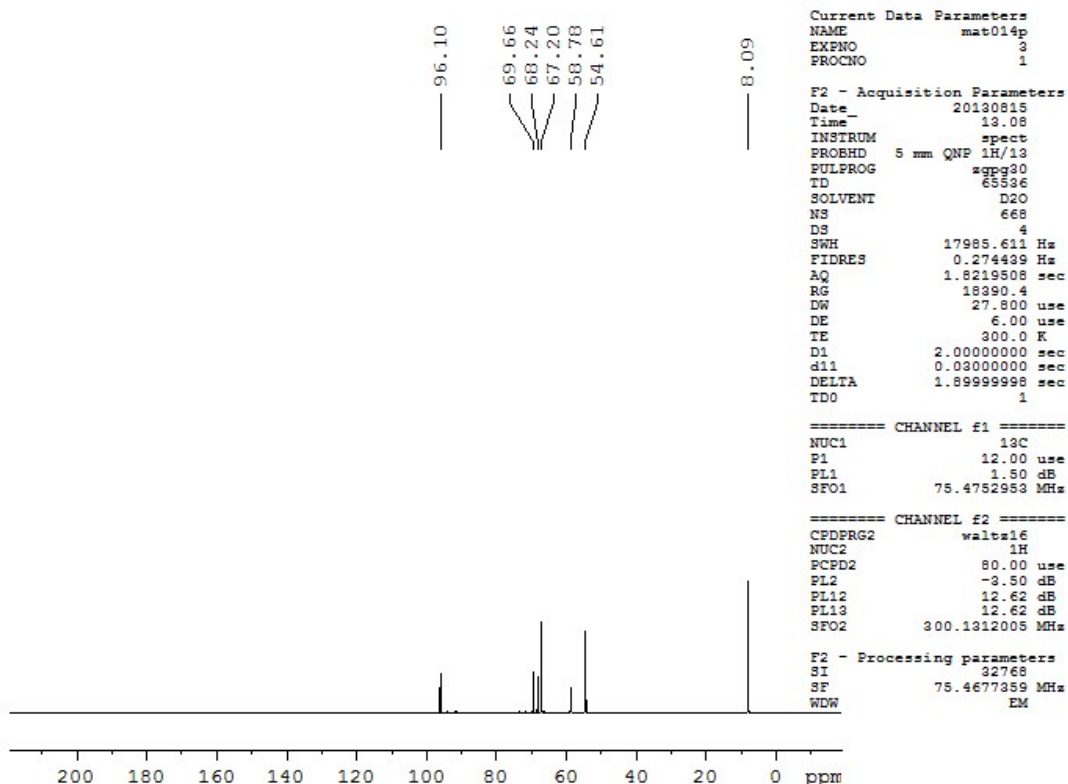

### $^{13}\text{C}$ NMR of **3** (75 MHz, $\text{D}_2\text{O}$ )

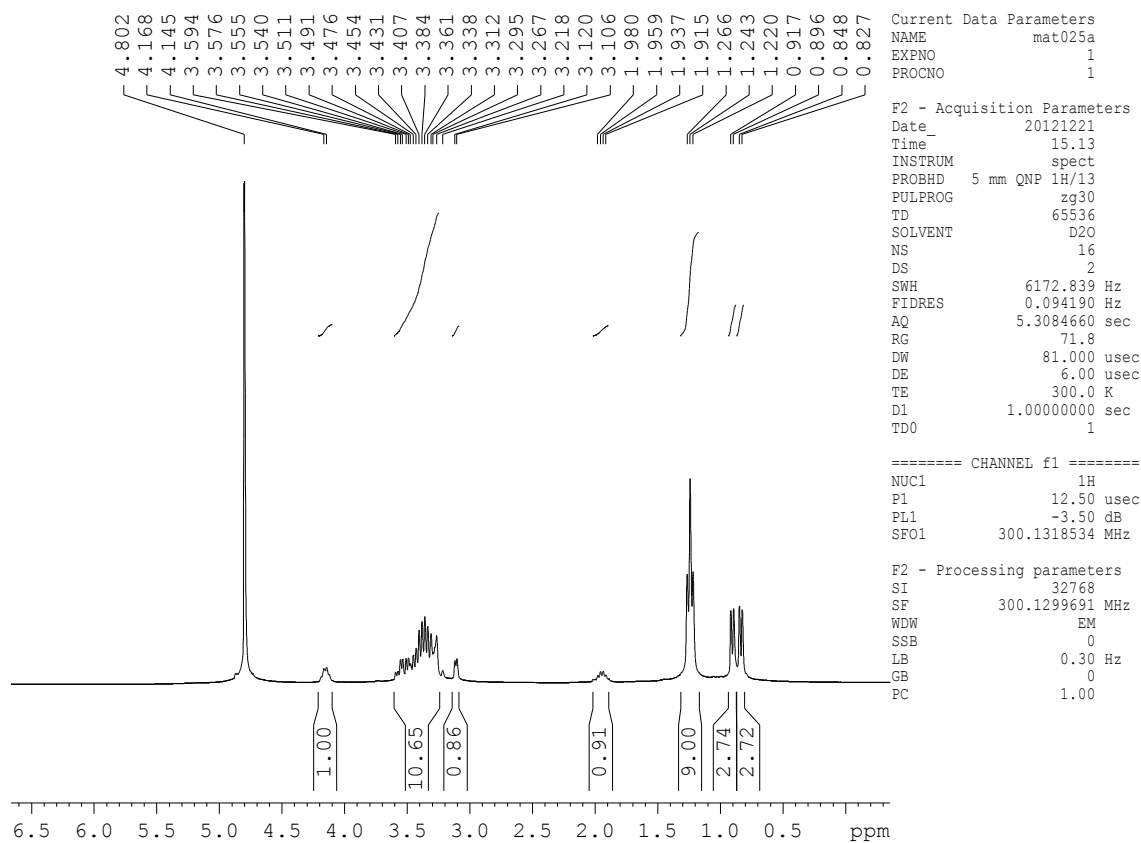

### $^1\text{H}$ NMR of **4a** (300 MHz, $\text{D}_2\text{O}$ )

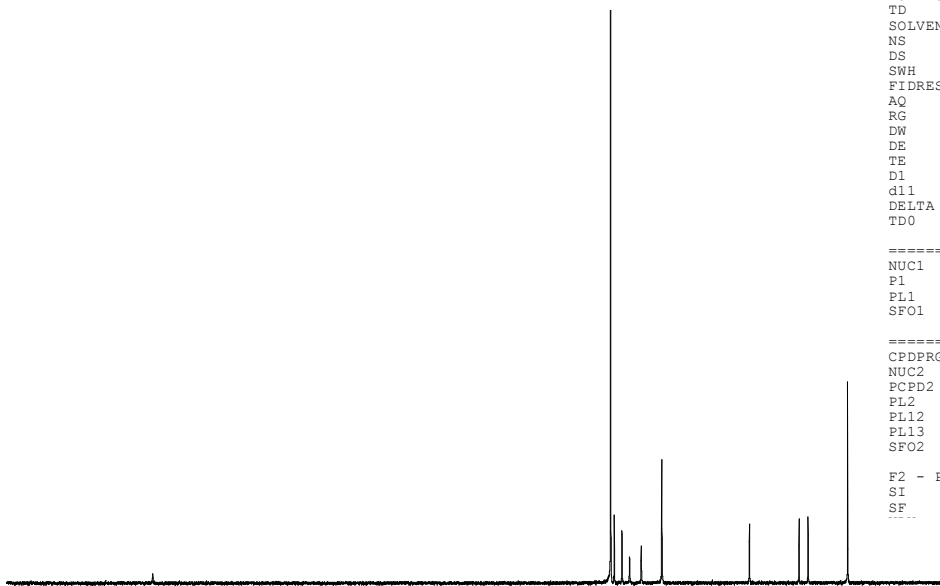

Current Data Parameters  
 NAME MAT025  
 EXPNO 2  
 PROCNO 1

F2 - Acquisition Parameter  
 Date\_ 20121108  
 Time\_ 11.29  
 INSTRUM spect  
 PROBHD 5 mm QNP 1H/13  
 PULPROG zgpg30  
 TD 65536  
 SOLVENT D2O  
 NS 1024  
 DS 4  
 SWH 17985.611 Hz  
 FIDRES 0.274439 Hz  
 AQ 1.8219508 se  
 RG 18390.4  
 DW 27.800 us  
 DE 6.00 us  
 TE 300.0 K  
 D1 2.00000000 se  
 d11 0.03000000 se  
 DELTA 1.89999998 se  
 TD0 1

==== CHANNEL f1 =====  
 NUC1 13C  
 P1 12.00 us  
 PL1 1.50 dB  
 SFO1 75.4752953 MH

==== CHANNEL f2 =====  
 CPDPRG2 waltz16  
 NUC2 1H  
 PCPD2 80.00 us  
 PL2 -3.50 dB  
 PL12 12.62 dB  
 PL13 12.62 dB  
 SFO2 300.1312005 MH

F2 - Processing parameters  
 SI 32768  
 SF 75.4677113 MH

<sup>13</sup>C NMR of **4a** (75 MHz, D<sub>2</sub>O)

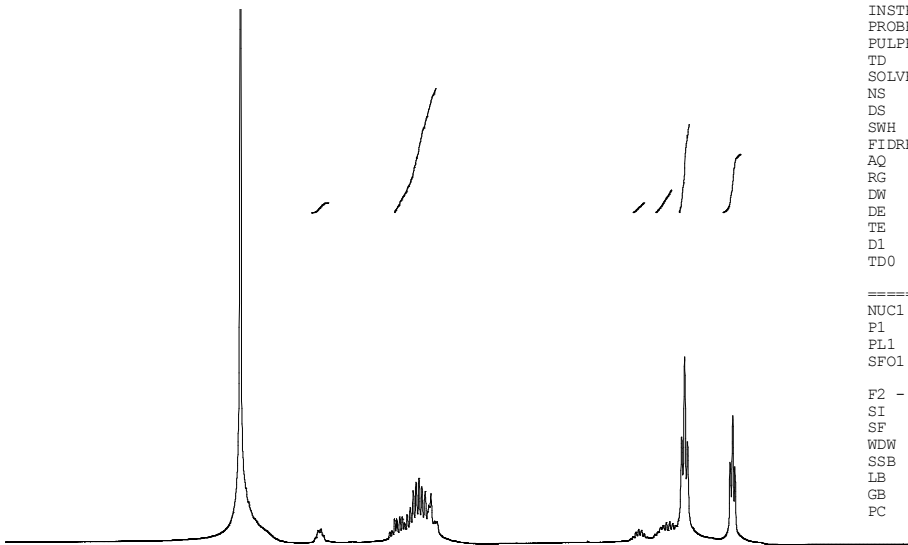

Current Data Parameters  
 NAME MAT021  
 EXPNO 1  
 PROCNO 1

F2 - Acquisition Parameters  
 Date\_ 20121221  
 Time\_ 15.23  
 INSTRUM spect  
 PROBHD 5 mm QNP 1H/13  
 PULPROG zg30  
 TD 65536  
 SOLVENT D2O  
 NS 16  
 DS 2  
 SWH 6172.839 Hz  
 FIDRES 0.094190 Hz  
 AQ 5.3084660 sec  
 RG 161.3  
 DW 81.000 usec  
 DE 6.00 usec  
 TE 300.0 K  
 D1 1.00000000 sec  
 TD0 1

==== CHANNEL f1 =====  
 NUC1 1H  
 P1 12.50 usec  
 PL1 -3.50 dB  
 SFO1 300.1318534 MHz

F2 - Processing parameters  
 SI 32768  
 SF 300.1299702 MHz  
 WDW EM  
 SSB 0  
 LB 0.30 Hz  
 GB 0  
 PC 1.00

<sup>1</sup>H NMR of **4b** (300 MHz, D<sub>2</sub>O)

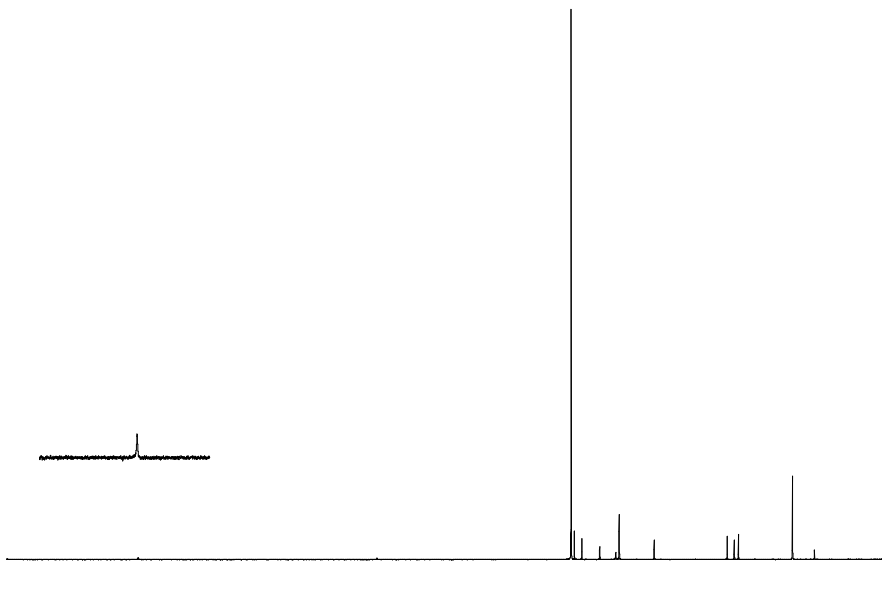

```

Current Data Parameters
NAME          mat021a
EXPNO        2
PROCNO       1

F2 - Acquisition Parameter
Date_        20121110
Time         17.31
INSTRUM      spect
PROBHD       5 mm QNP 1H/13
PULPROG      zgpg30
TD           65536
SOLVENT      D2O
NS           20480
DS           4
SWH          17985.611 Hz
FIDRES       0.274439 Hz
AQ           1.8219508 se
RG           18390.4
DW           27.800 us
DE           6.00 us
TE           300.0 K
D1           2.00000000 se
d11          0.03000000 se
DELTA        1.89999998 se
TD0          1

===== CHANNEL f1 =====
NUC1          13C
P1            12.00 us
PL1           1.50 dB
SFO1          75.4752953 MH

===== CHANNEL f2 =====
CPDPRG2       waltz16
NUC2           1H
PCPD2         80.00 us
PL2           -3.50 dB
PL12          12.62 dB
PL13          12.62 dB
SFO2          300.1312005 MH

F2 - Processing parameters
SI            32768
SF            75.4677105 MH
WDW           EM
SSB           0
LB            1.00 Hz
GB            0
PC            1.40

```

<sup>13</sup>C NMR of **4b** (75 MHz, D<sub>2</sub>O)

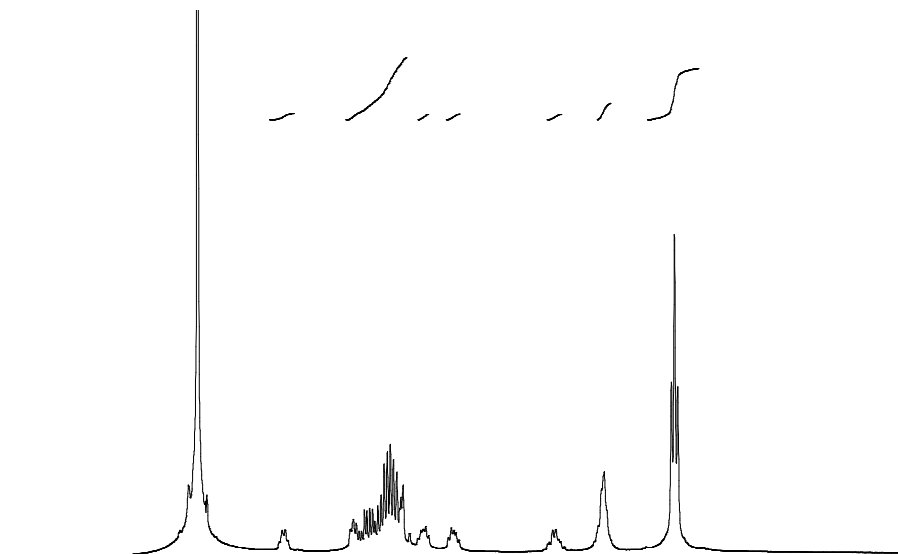

```

Current Data Parameters
NAME          mat022c1
EXPNO        1
PROCNO       1

F2 - Acquisition Parameters
Date_        20130131
Time         11.32
INSTRUM      spect
PROBHD       5 mm QNP 1H/13
PULPROG      zg30
TD           65536
SOLVENT      D2O
NS           16
DS           2
SWH          6172.839 Hz
FIDRES       0.094190 Hz
AQ           5.3084660 sec
RG           101.6
DW           81.000 usec
DE           6.00 usec
TE           300.0 K
D1           1.00000000 sec
TD0          1

===== CHANNEL f1 =====
NUC1          1H
P1            12.50 usec
PL1           -3.50 dB
SFO1          300.1318534 MHz

F2 - Processing parameters
SI            32768
SF            300.1299690 MHz
WDW           EM
SSB           0
LB            0.30 Hz
GB            0
PC            1.00

```

<sup>1</sup>H NMR of **4c** (300 MHz, D<sub>2</sub>O)

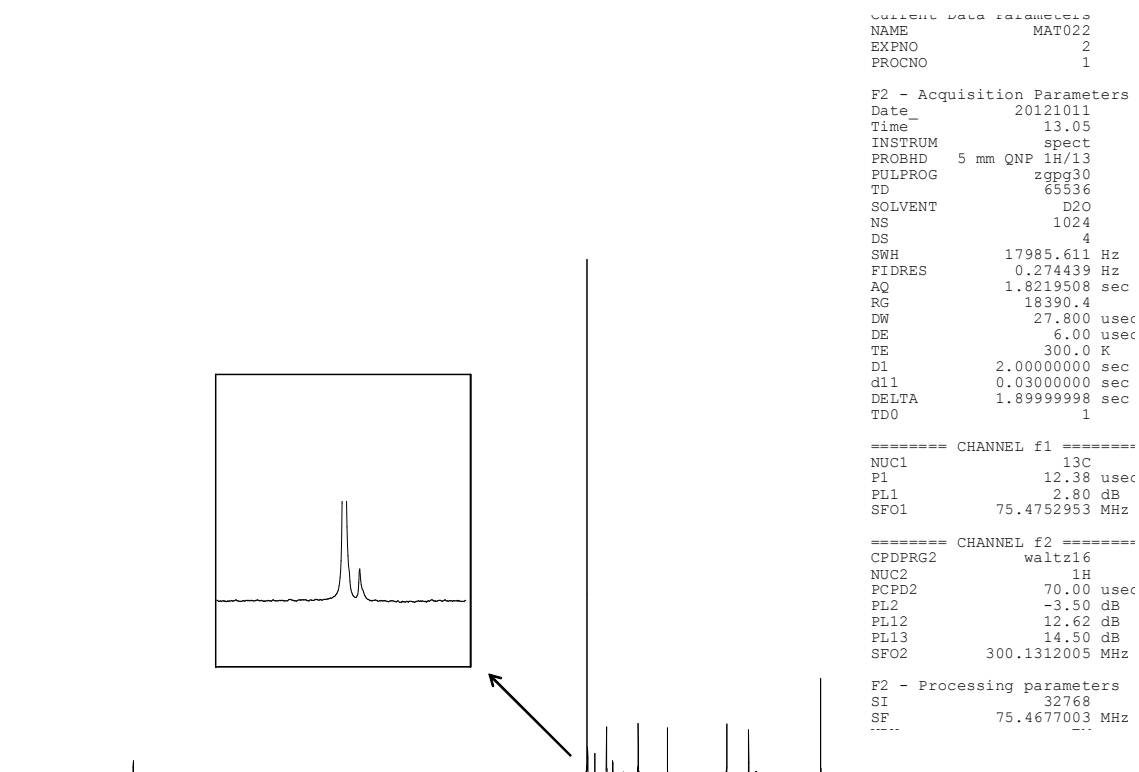

$^{13}\text{C}$  NMR of **4c** (75 MHz,  $\text{D}_2\text{O}$ )

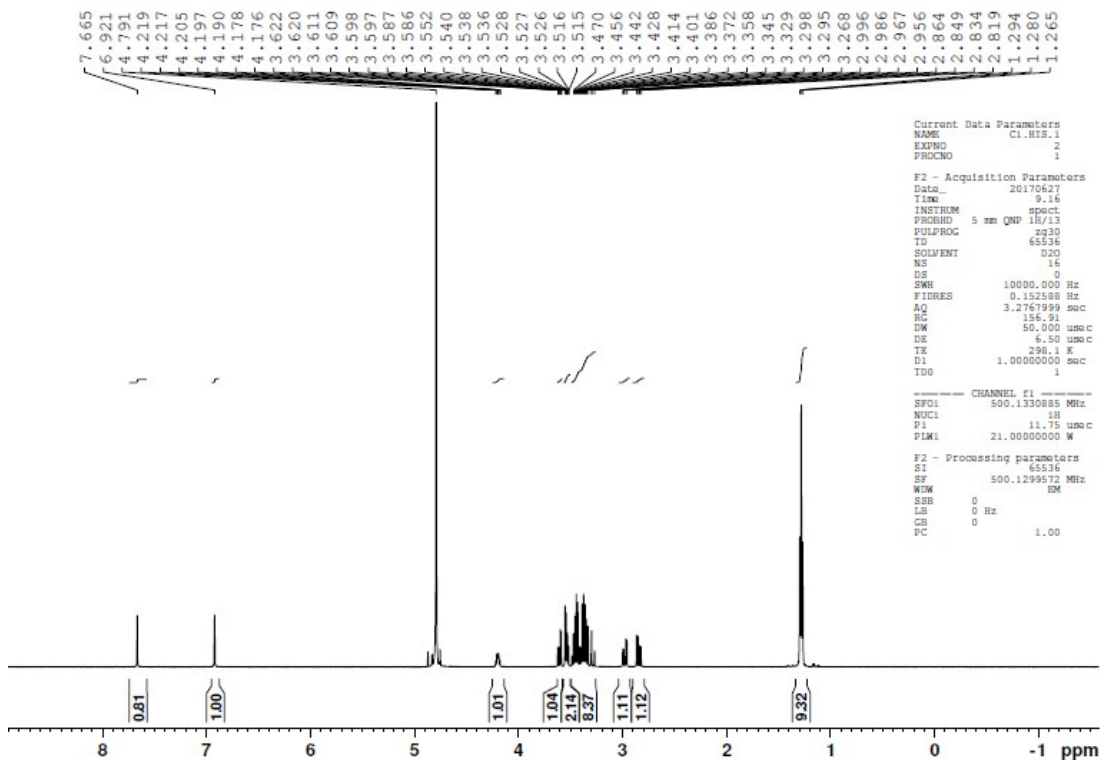

$^1\text{H}$  NMR of **4d** (500 MHz,  $\text{D}_2\text{O}$ )

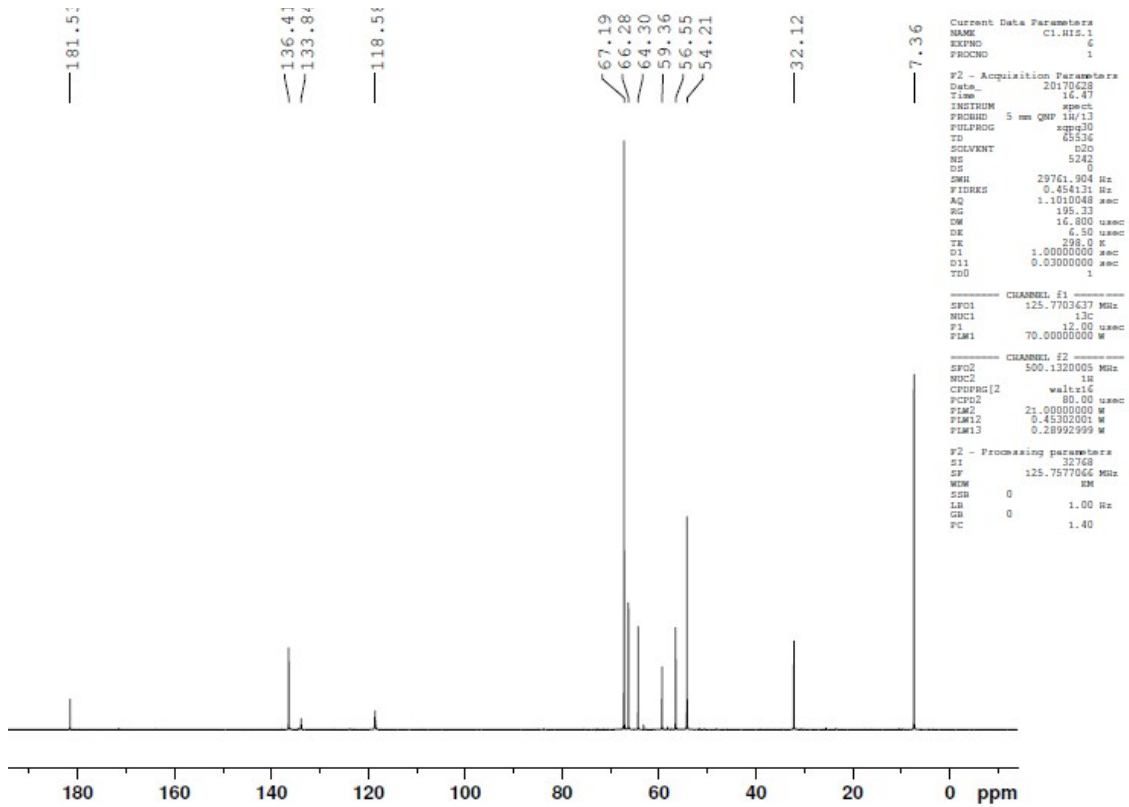

<sup>13</sup>C NMR of **4d** (125 MHz, D<sub>2</sub>O)

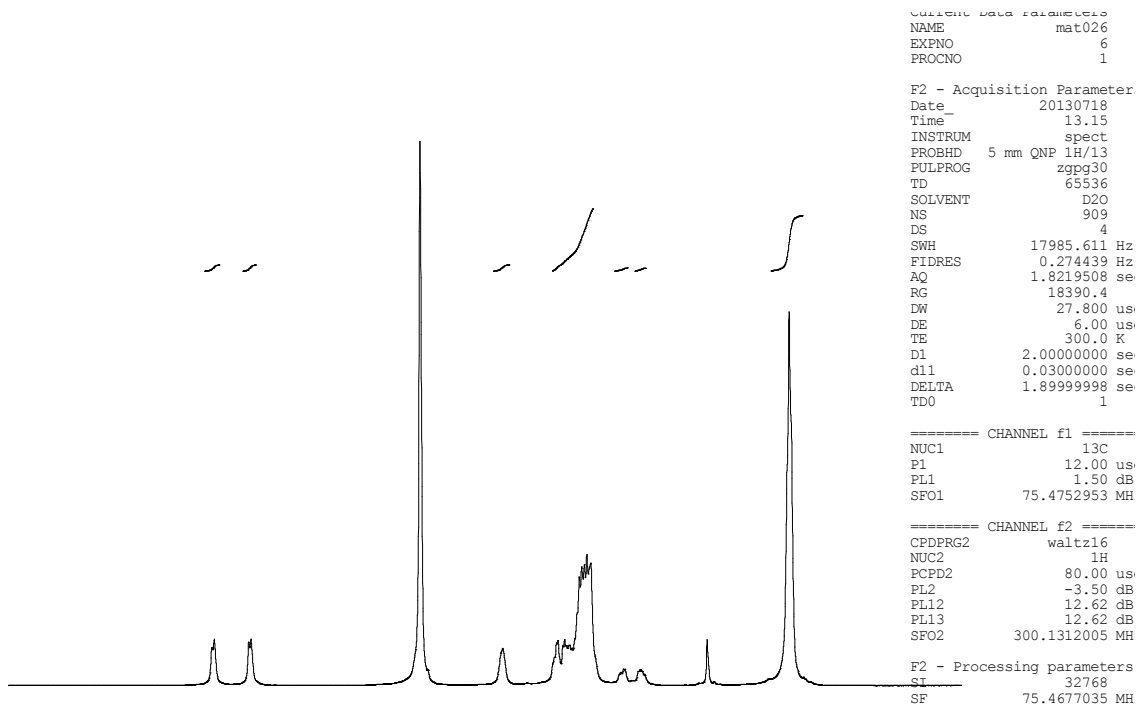



# <sup>1</sup>H NMR of 4e (300 MHz, D<sub>2</sub>O)

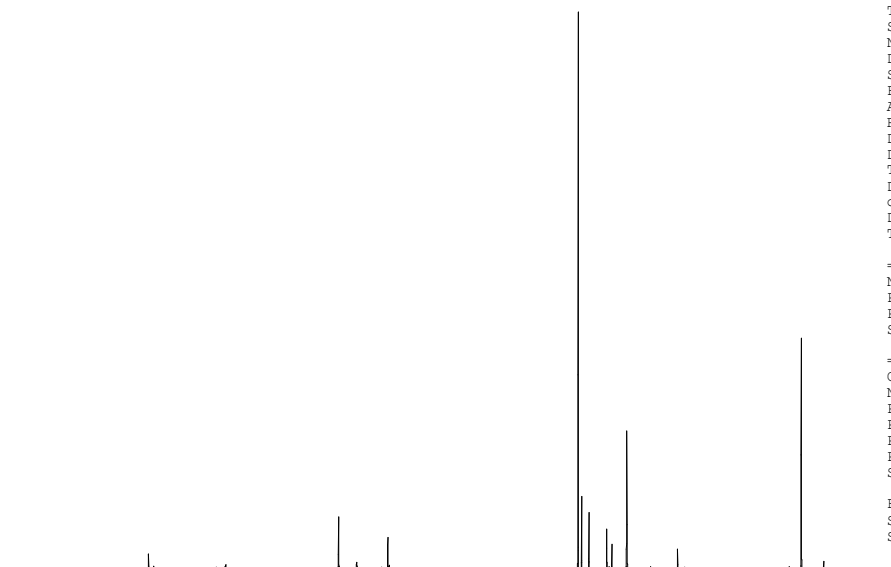

```
Current Data Parameters
NAME      mat026
EXPNO     6
PROCNO    1

F2 - Acquisition Parameter:
Date_     20130718
Time_     13.15
INSTRUM   spect
PROBHD    5 mm QNP 1H/13
PULPROG   zgpg30
TD         65536
SOLVENT   D2O
NS         909
DS         4
SWH        17985.611 Hz
FIDRES     0.274439 Hz
AQ         1.8219508 se
RG         18390.4
DW         27.800 us
DE         6.00 us
TE         300.0 K
D1         2.00000000 se
d11        0.03000000 se
DELTA     1.89999998 se
TD0        1

===== CHANNEL f1 =====
NUC1       13C
P1         12.00 us
PL1        1.50 dB
SFO1       75.4752953 MH

===== CHANNEL f2 =====
CPDPRG2   waltz16
NUC2       1H
PCPD2     80.00 us
PL2        -3.50 dB
PL12       12.62 dB
PL13       12.62 dB
SFO2       300.1312005 MH

F2 - Processing parameters
SI         32768
SF         75.4677035 MH
```

# <sup>13</sup>C NMR of 4e (75 MHz, D<sub>2</sub>O)

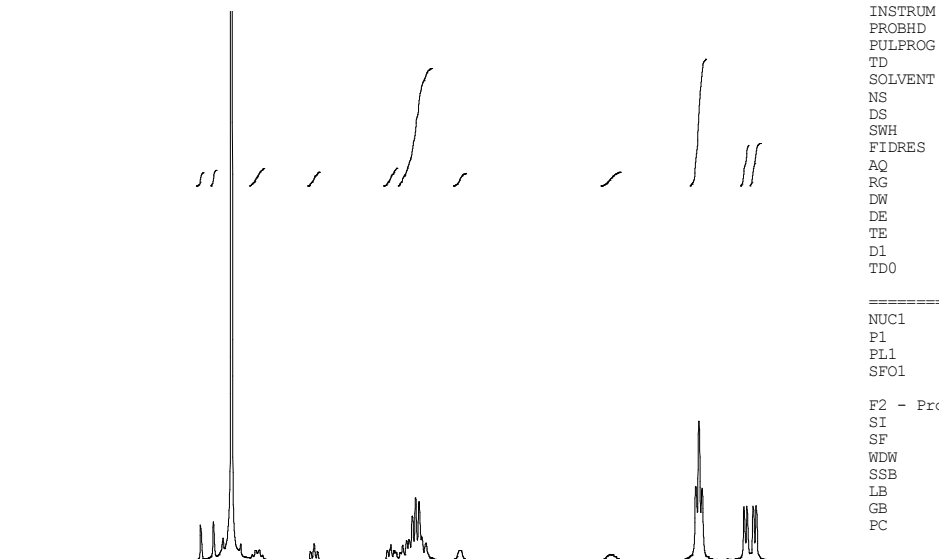

```
Current Data Parameters
NAME      mat029
EXPNO     1
PROCNO    1

F2 - Acquisition Parameters
Date_     20130221
Time_     10.46
INSTRUM   spect
PROBHD    5 mm QNP 1H/13
PULPROG   zg30
TD         65536
SOLVENT   D2O
NS         32
DS         2
SWH        6172.839 Hz
FIDRES     0.094190 Hz
AQ         5.3084660 sec
RG         80.6
DW         81.000 usec
DE         6.00 usec
TE         300.0 K
D1         1.00000000 sec
TD0        1

===== CHANNEL f1 =====
NUC1       1H
P1         12.50 usec
PL1        -3.50 dB
SFO1       300.1318534 MHz

F2 - Processing parameters
SI         32768
SF         300.1299700 MHz
WDW        EM
SSB        0
LB         0.30 Hz
GB         0
PC         1.00
```

# <sup>1</sup>H NMR of 5a (300 MHz, D<sub>2</sub>O)

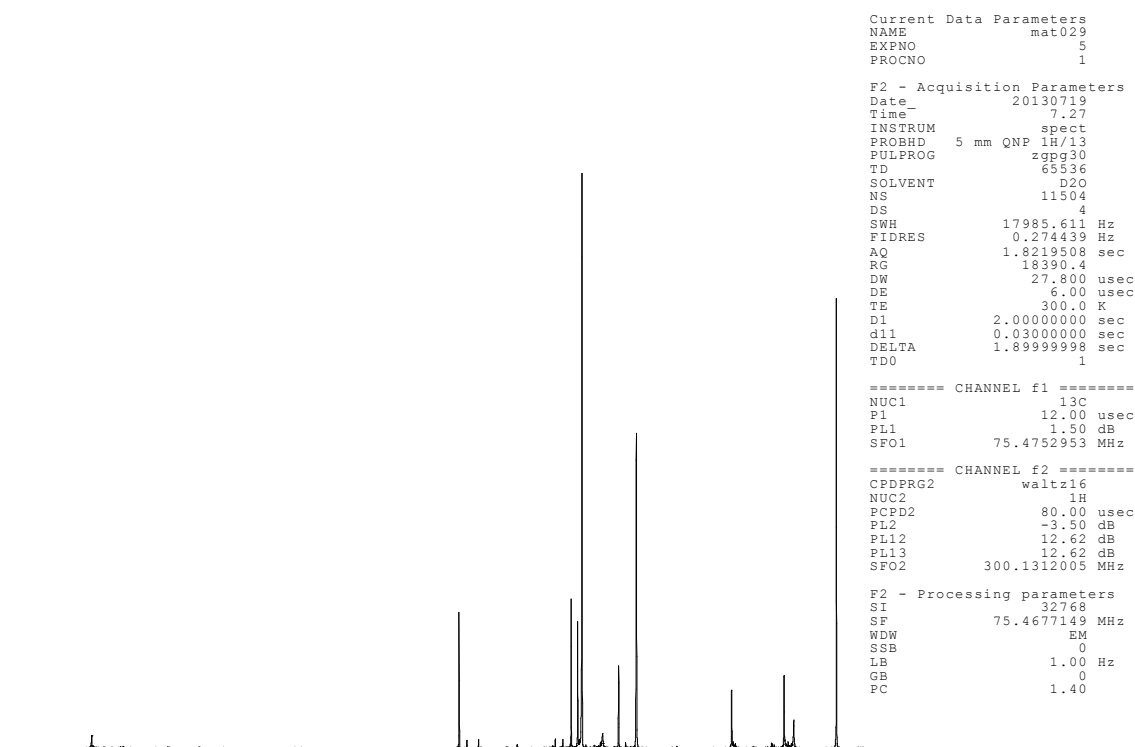

# <sup>13</sup>C NMR of 5a (75 MHz, D<sub>2</sub>O)

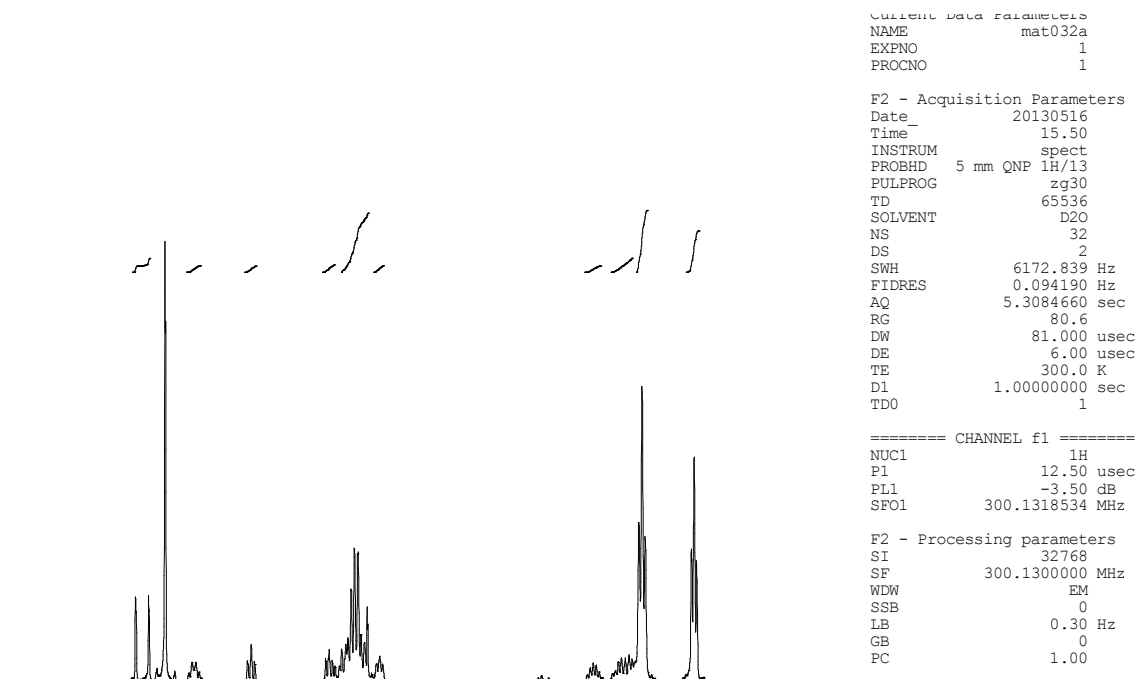

# <sup>1</sup>H NMR of **5b** (300 MHz, D<sub>2</sub>O)

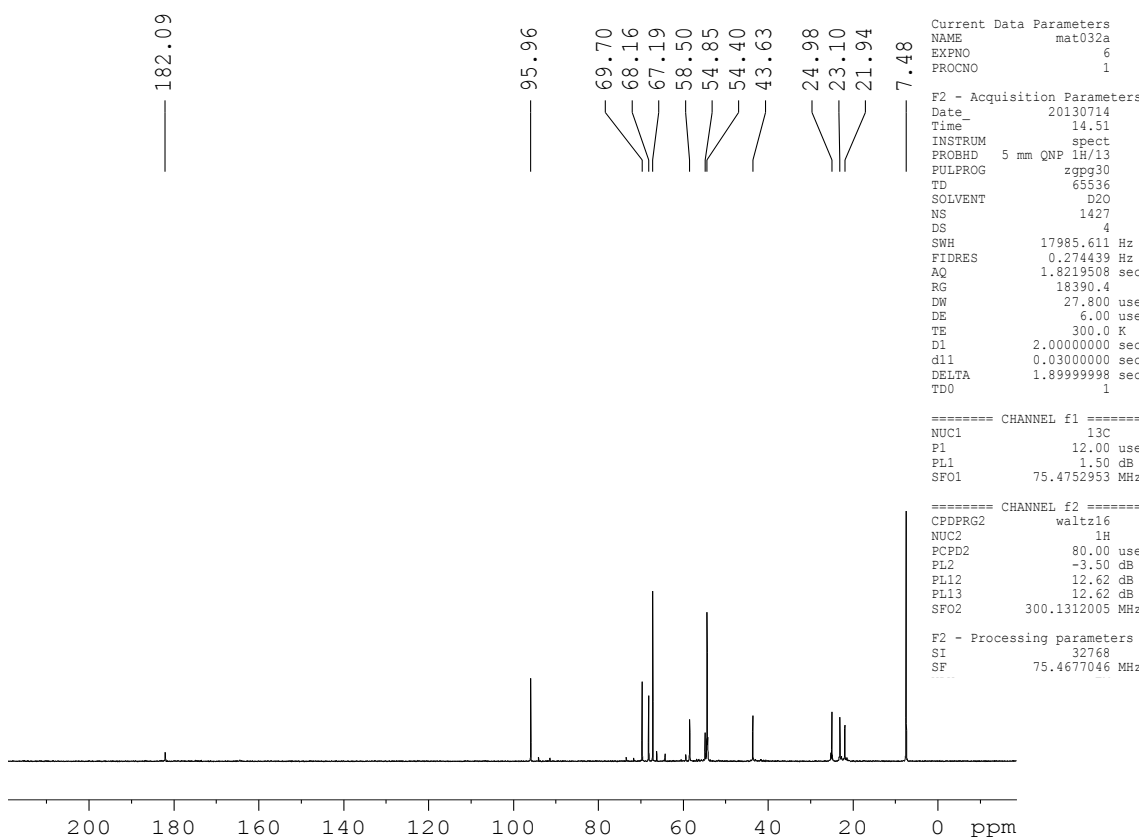

# <sup>13</sup>C NMR of **5b** (75 MHz, D<sub>2</sub>O)

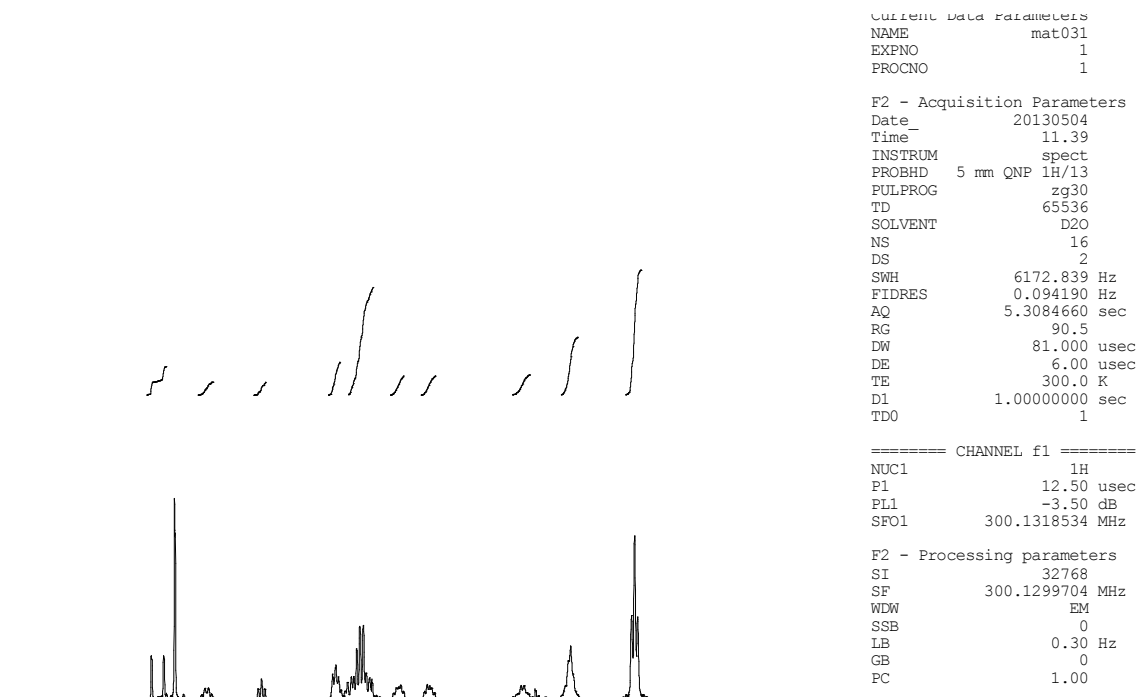

<sup>1</sup>H NMR of **5c** (300 MHz, D<sub>2</sub>O)

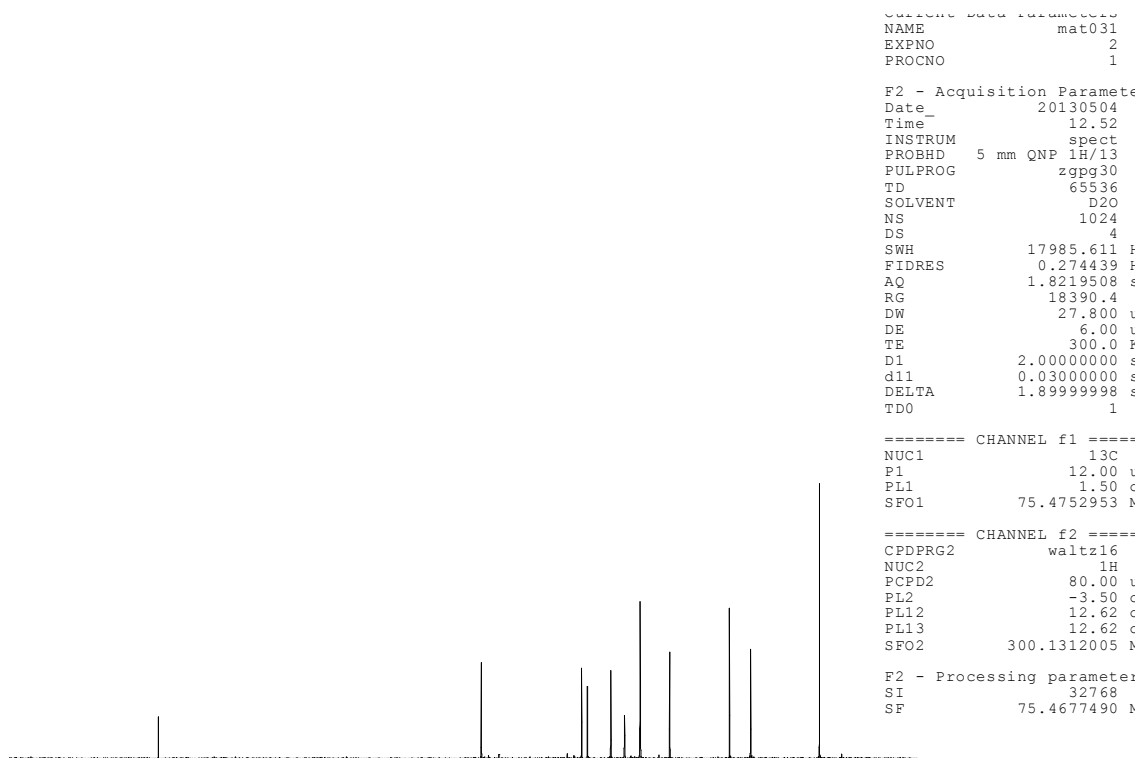

<sup>13</sup>C NMR of **5c** (75 MHz, D<sub>2</sub>O)

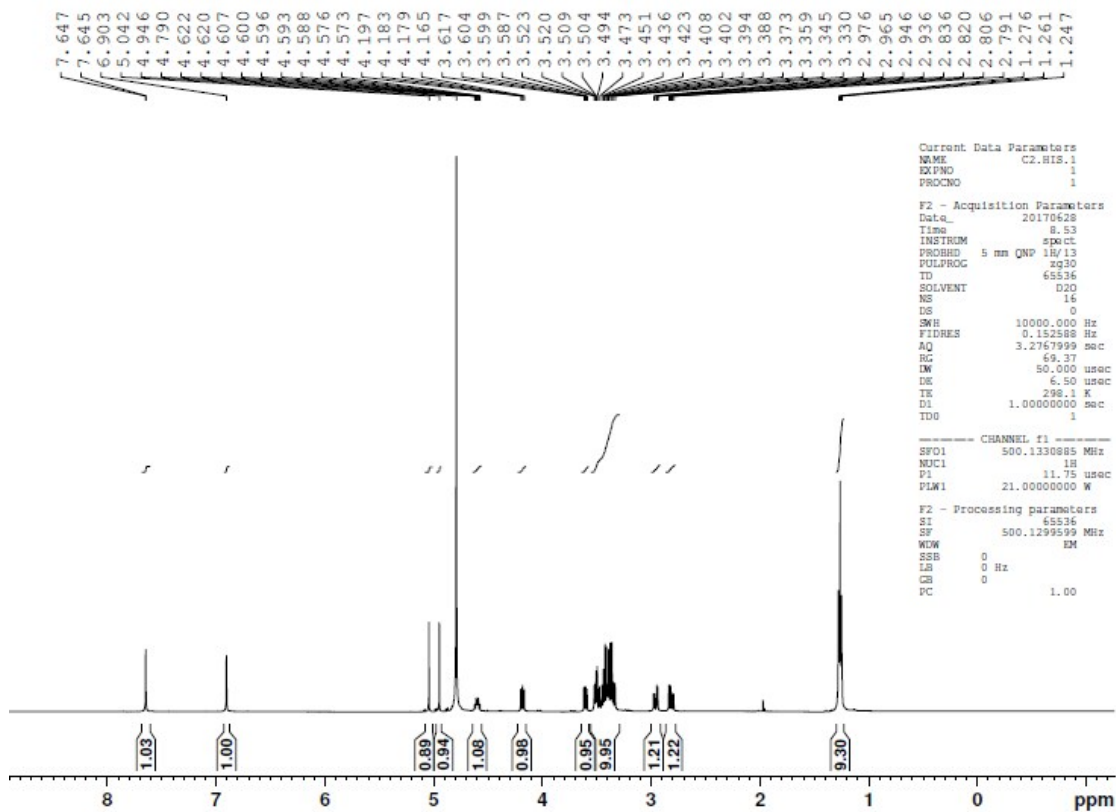

$^1\text{H}$  NMR of **5d** ( $\text{D}_2\text{O}$ , 500 MHz)

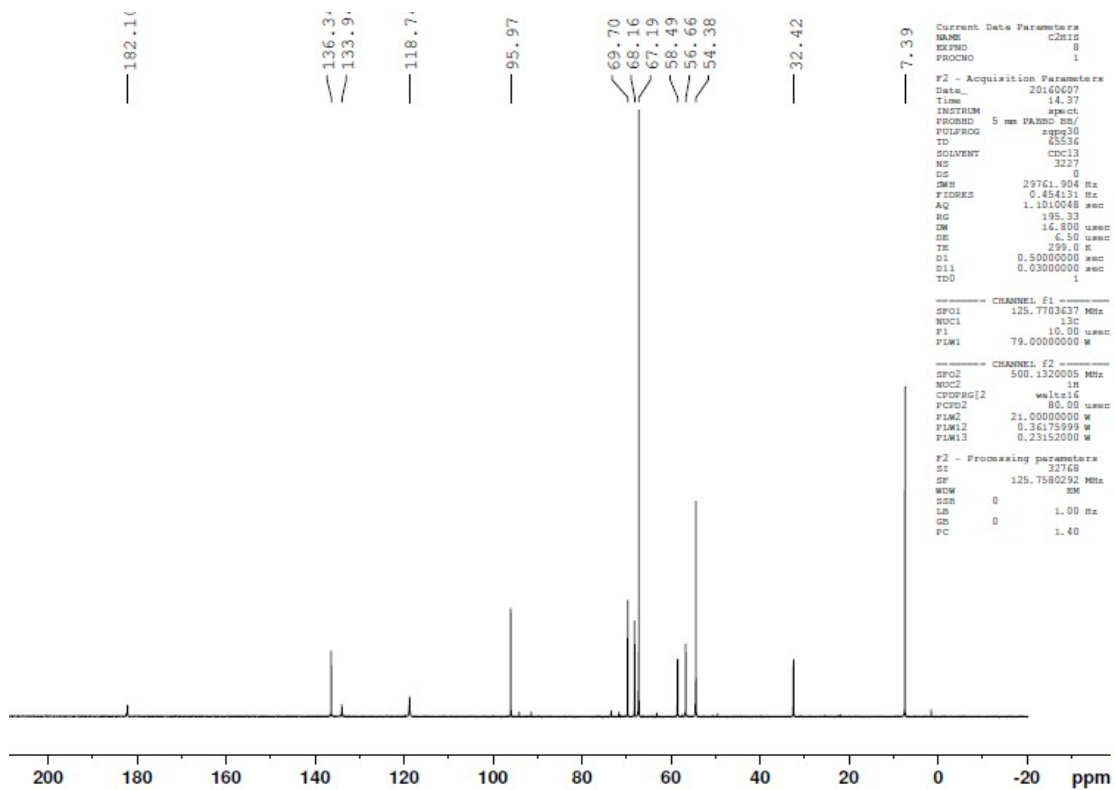

$^{13}\text{C}$  NMR of **5d** (125 MHz,  $\text{D}_2\text{O}$ )

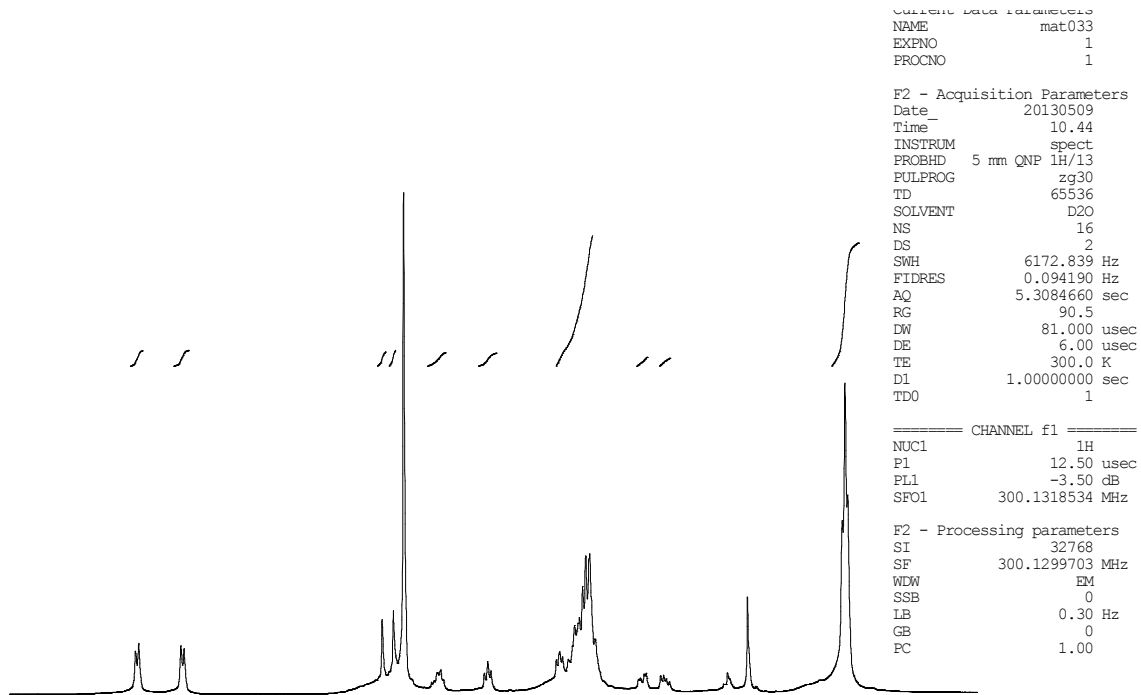

<sup>1</sup>H NMR of **5e** (300 MHz, D<sub>2</sub>O)

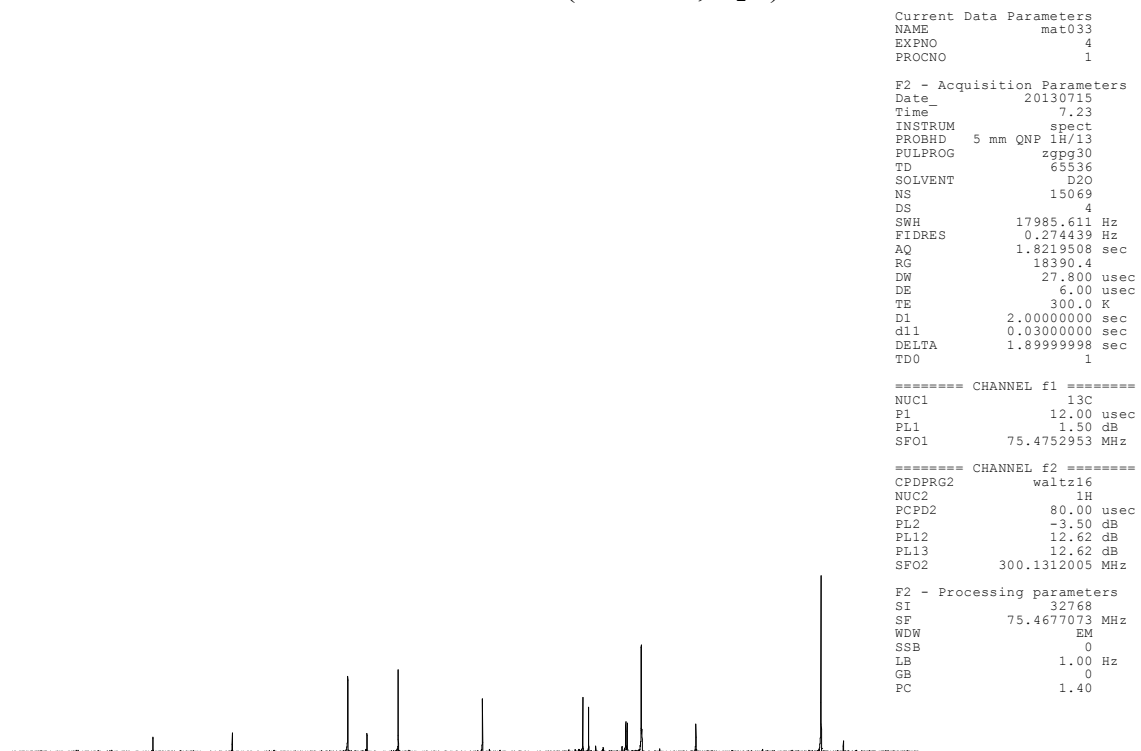

<sup>13</sup>C NMR of **5e** (75 MHz, D<sub>2</sub>O)

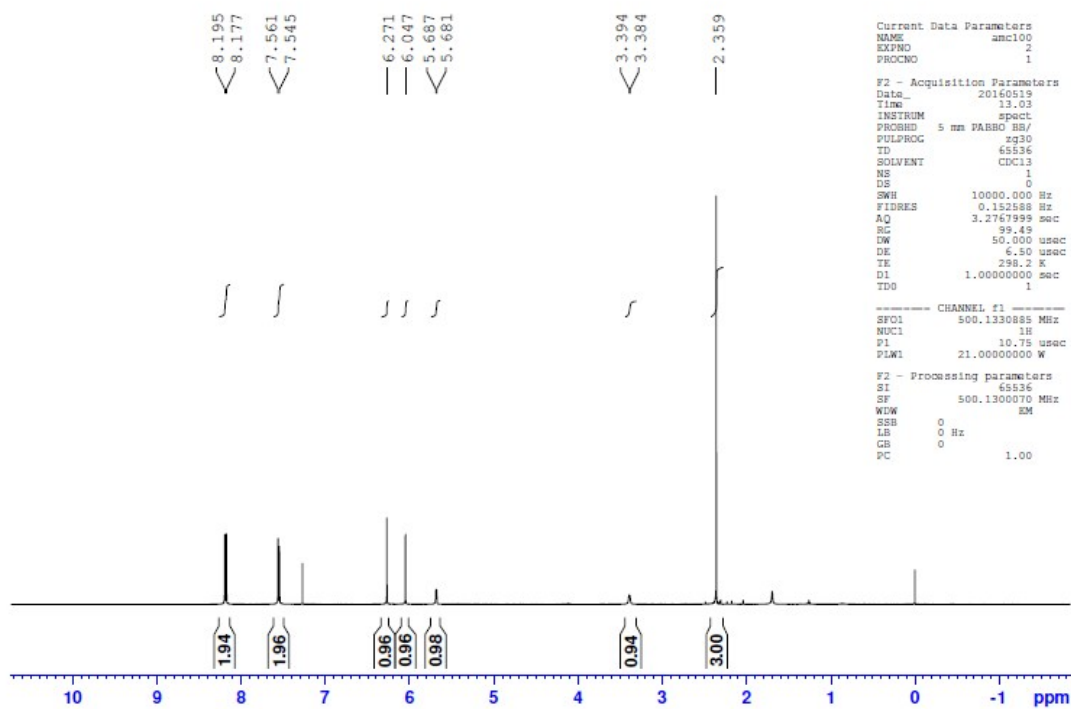

<sup>1</sup>H NMR of **8a** (500 MHz, CDCl<sub>3</sub>)

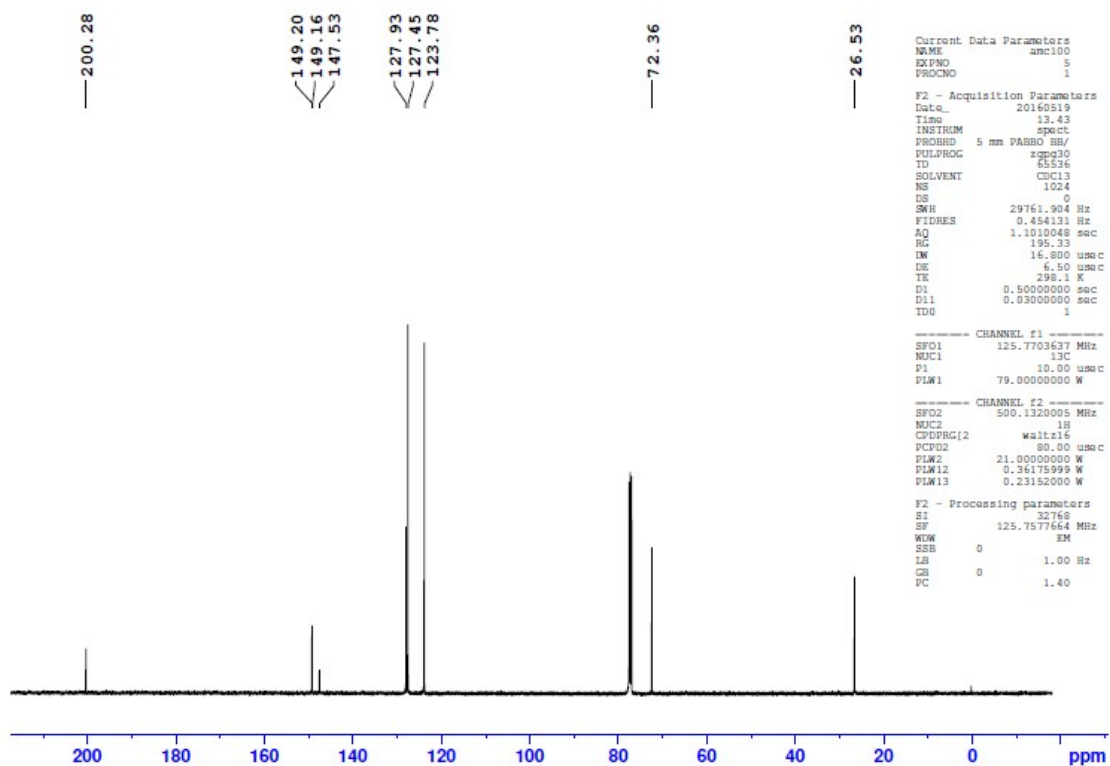

<sup>13</sup>C NMR of **8a** (125 MHz, CDCl<sub>3</sub>)

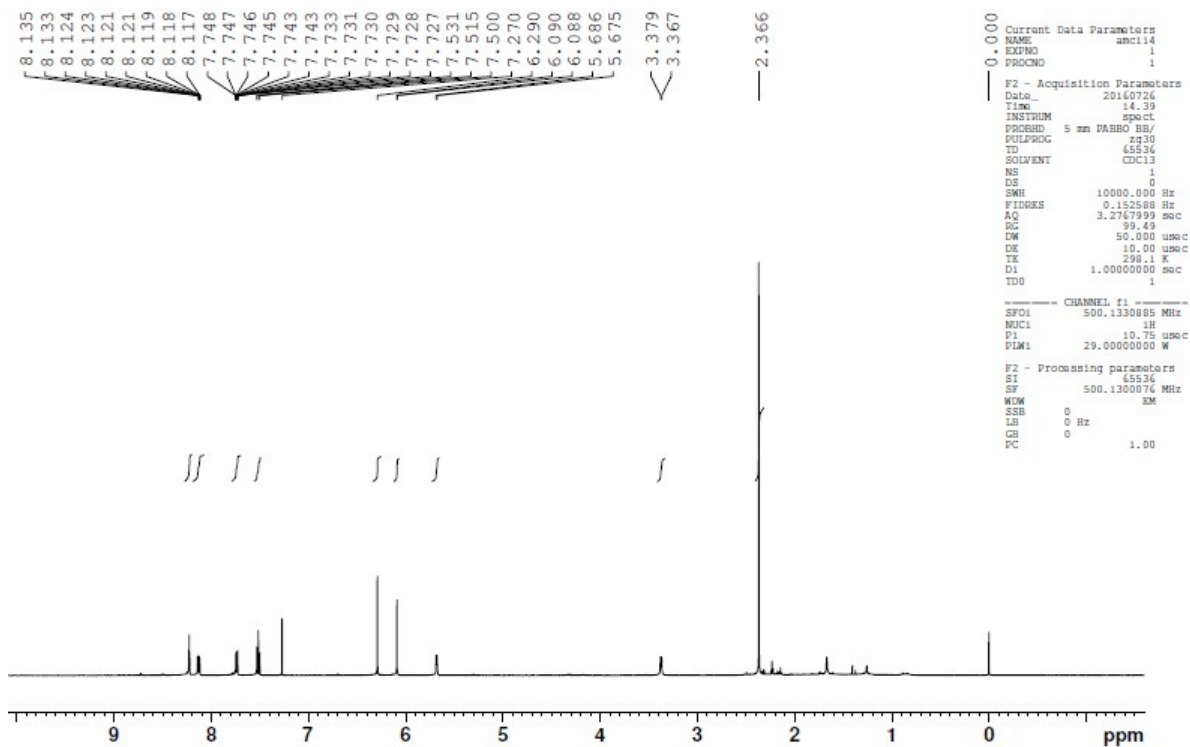

$^1\text{H}$  NMR of **8b** (500 MHz,  $\text{CDCl}_3$ )

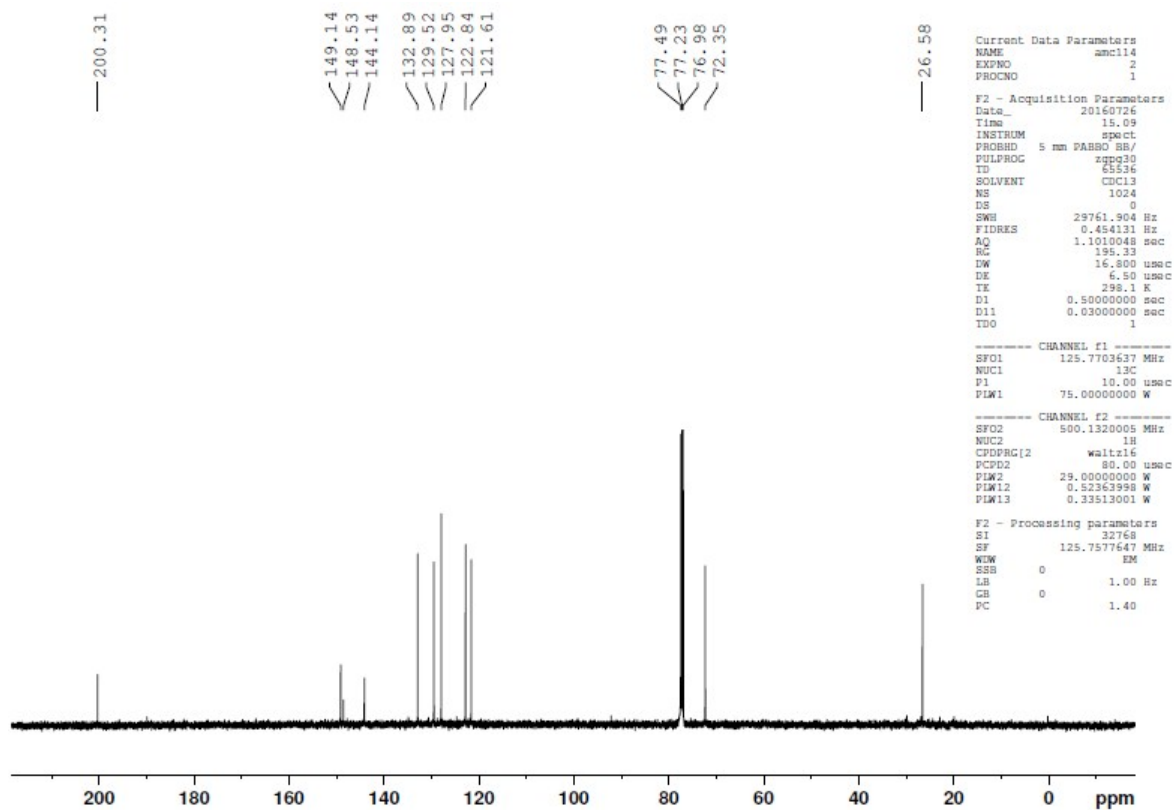

$^{13}\text{C}$  NMR of **8b** (125 MHz,  $\text{CDCl}_3$ )



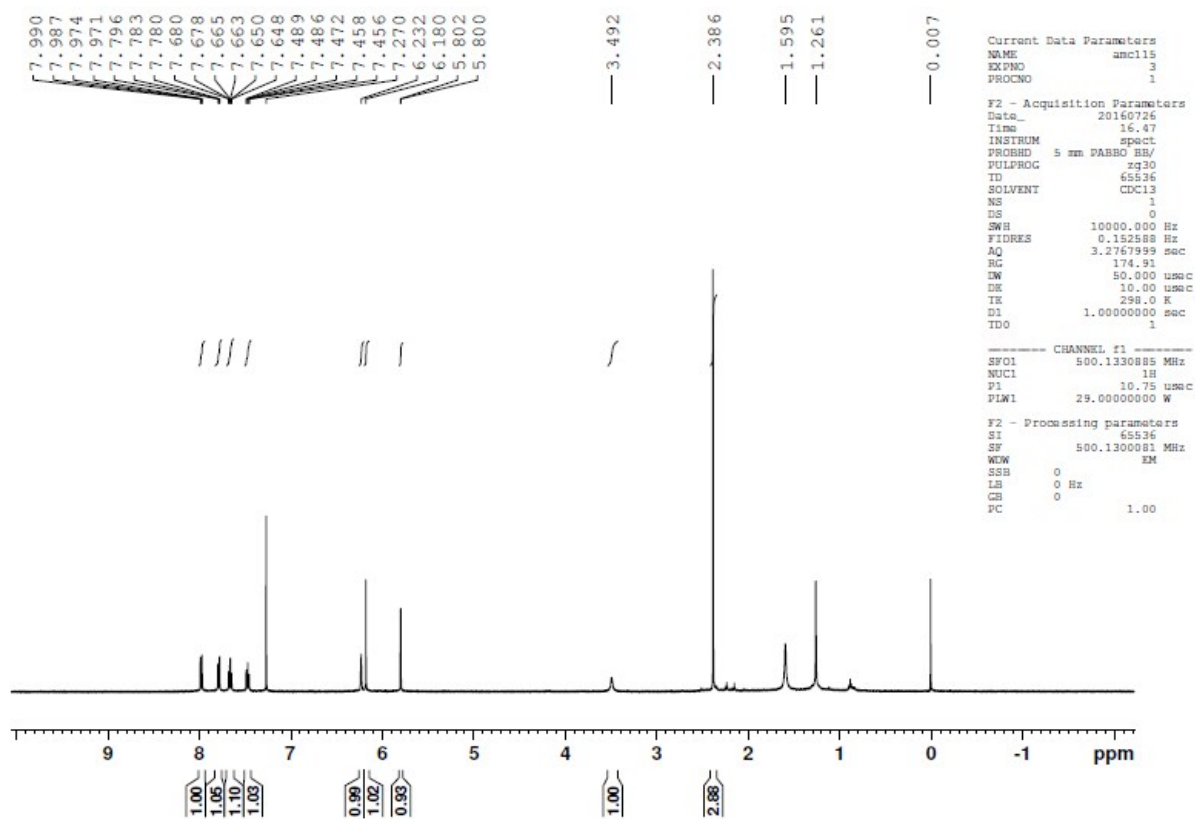

<sup>1</sup>H NMR of **8c** (500 MHz, CDCl<sub>3</sub>)

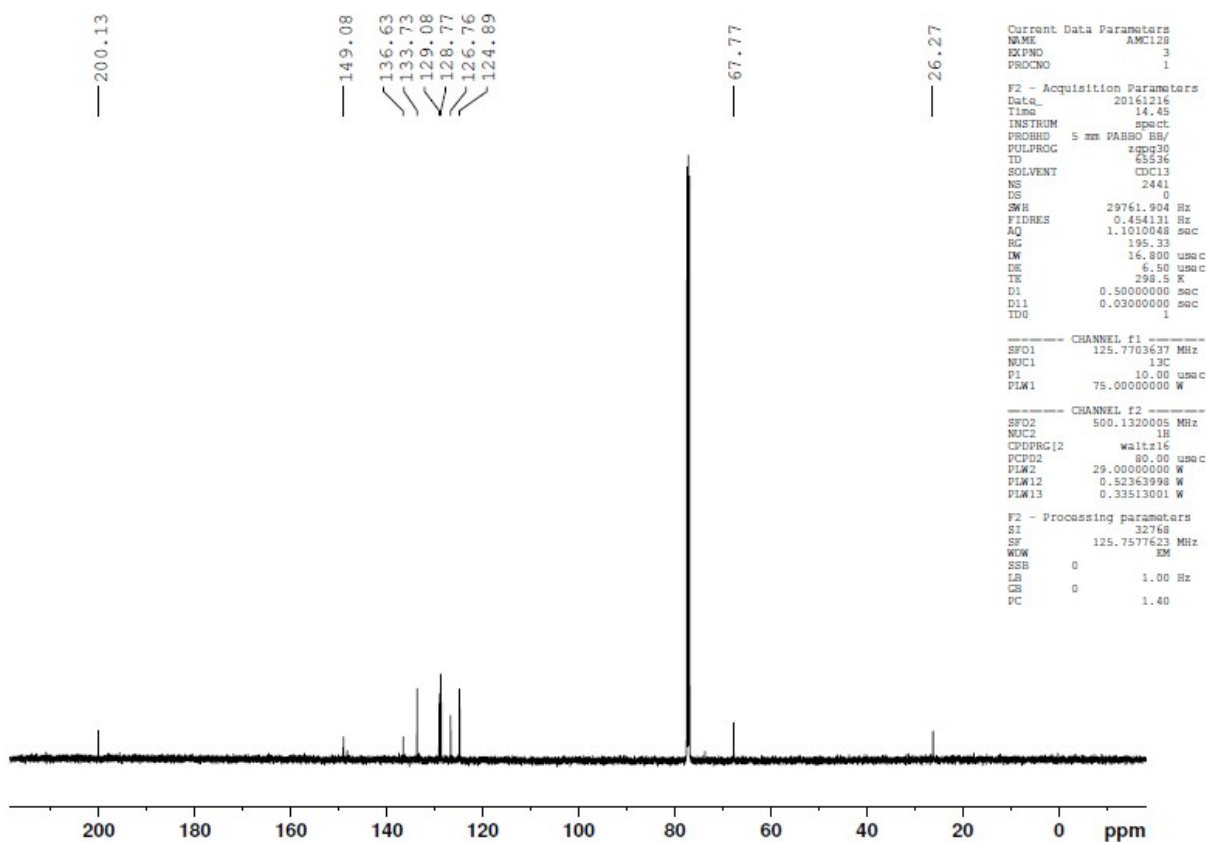

<sup>13</sup>C NMR of **8c** (125 MHz, CDCl<sub>3</sub>)

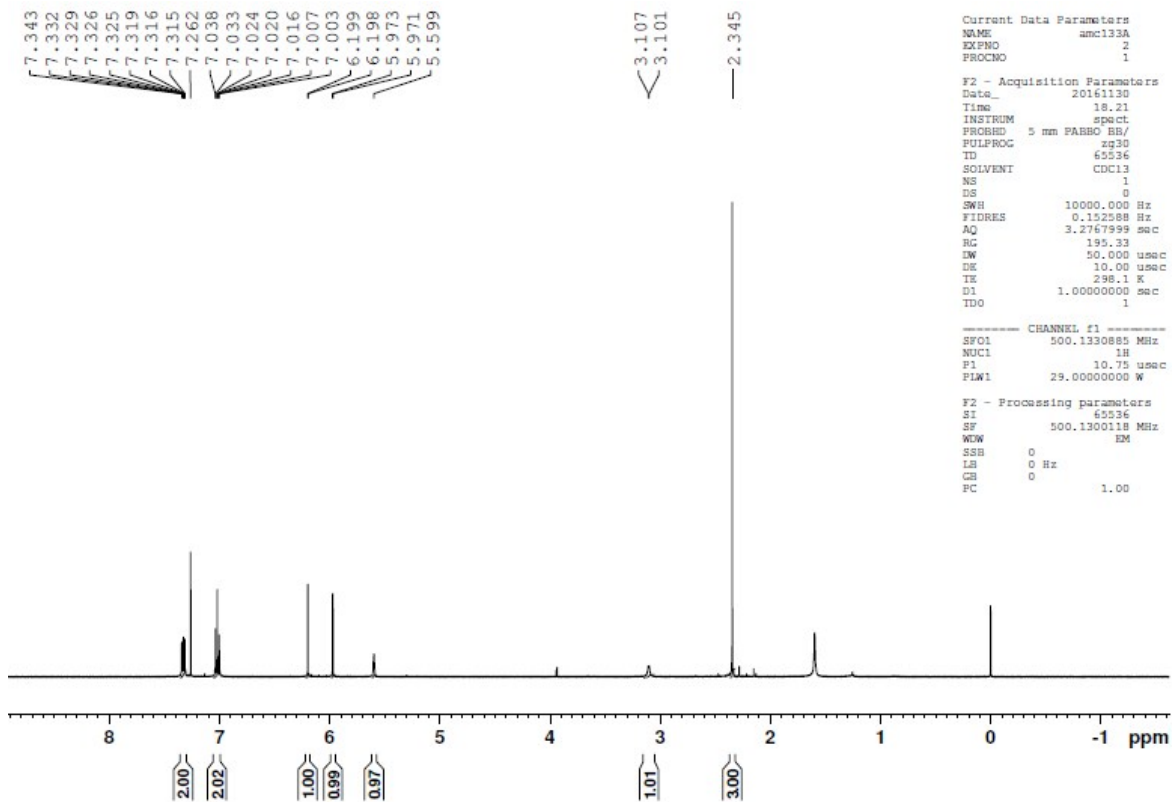

<sup>1</sup>H NMR of **8d** (500 MHz, CDCl<sub>3</sub>)

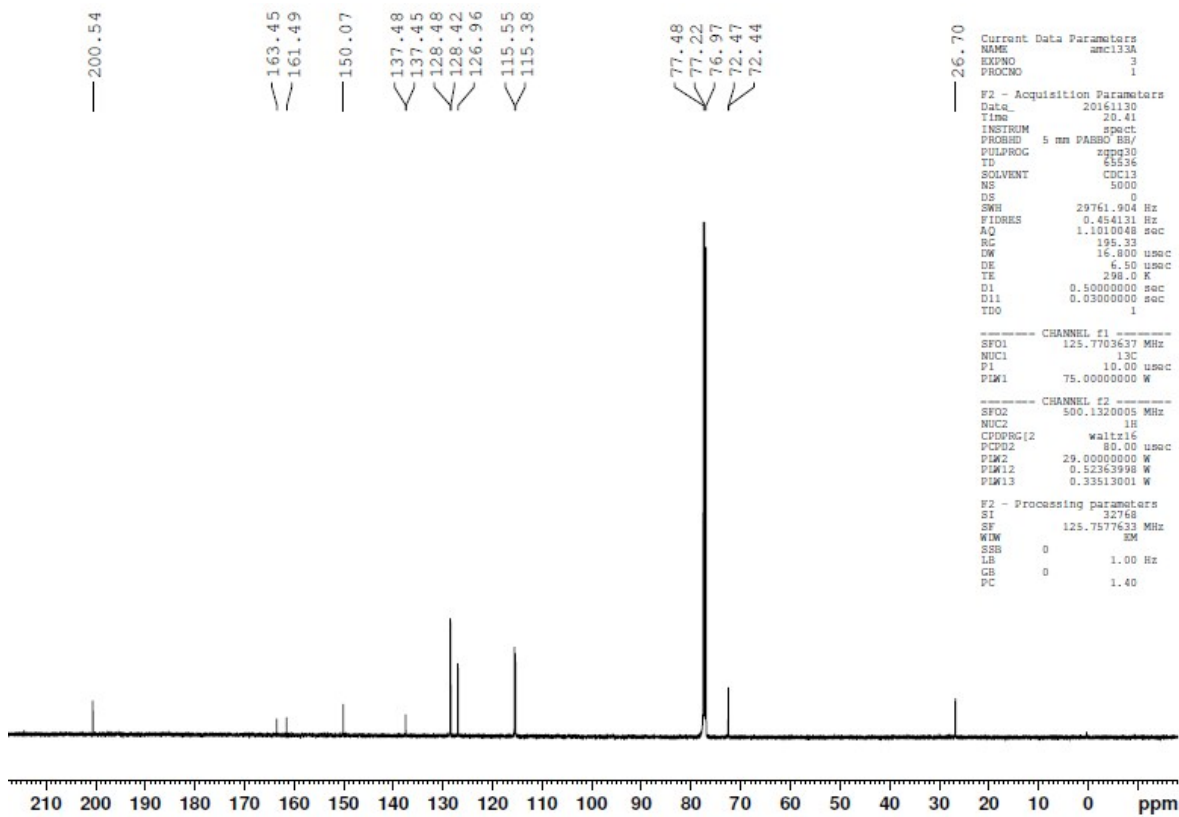

<sup>13</sup>C NMR of **8d** (125 MHz, CDCl<sub>3</sub>)

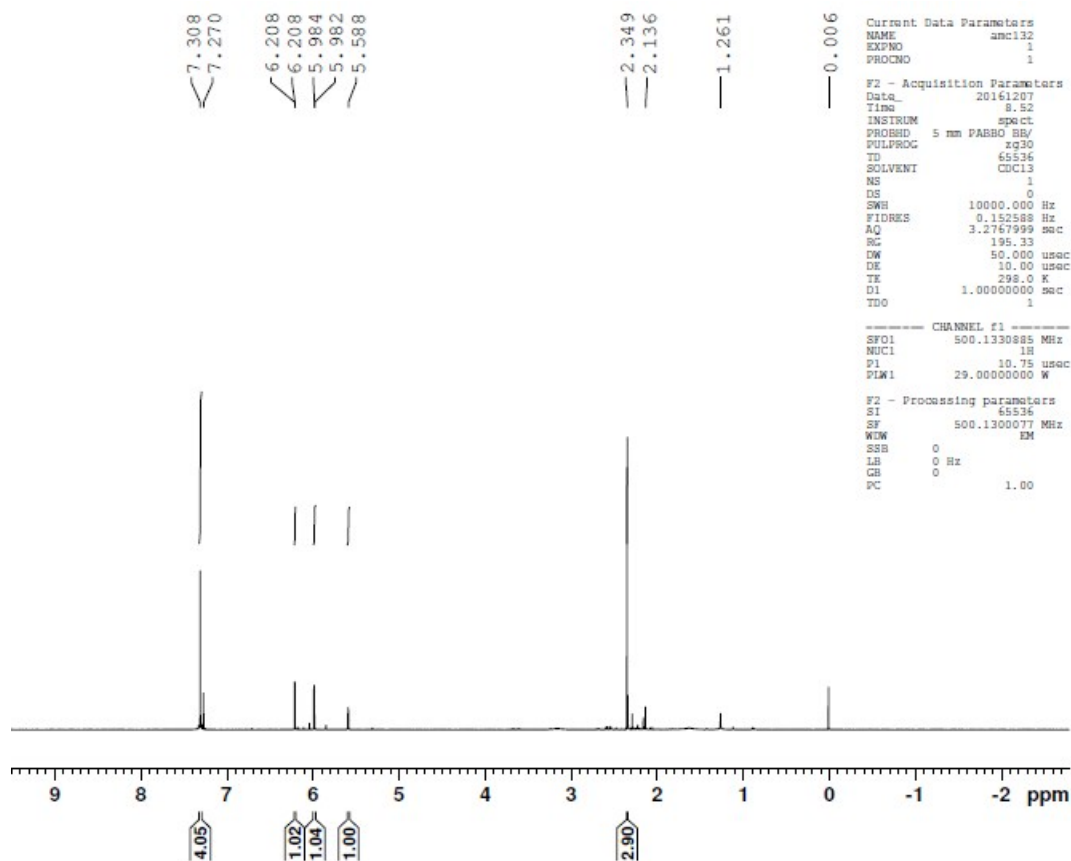

<sup>1</sup>H NMR of **8e** (500 MHz, CDCl<sub>3</sub>)

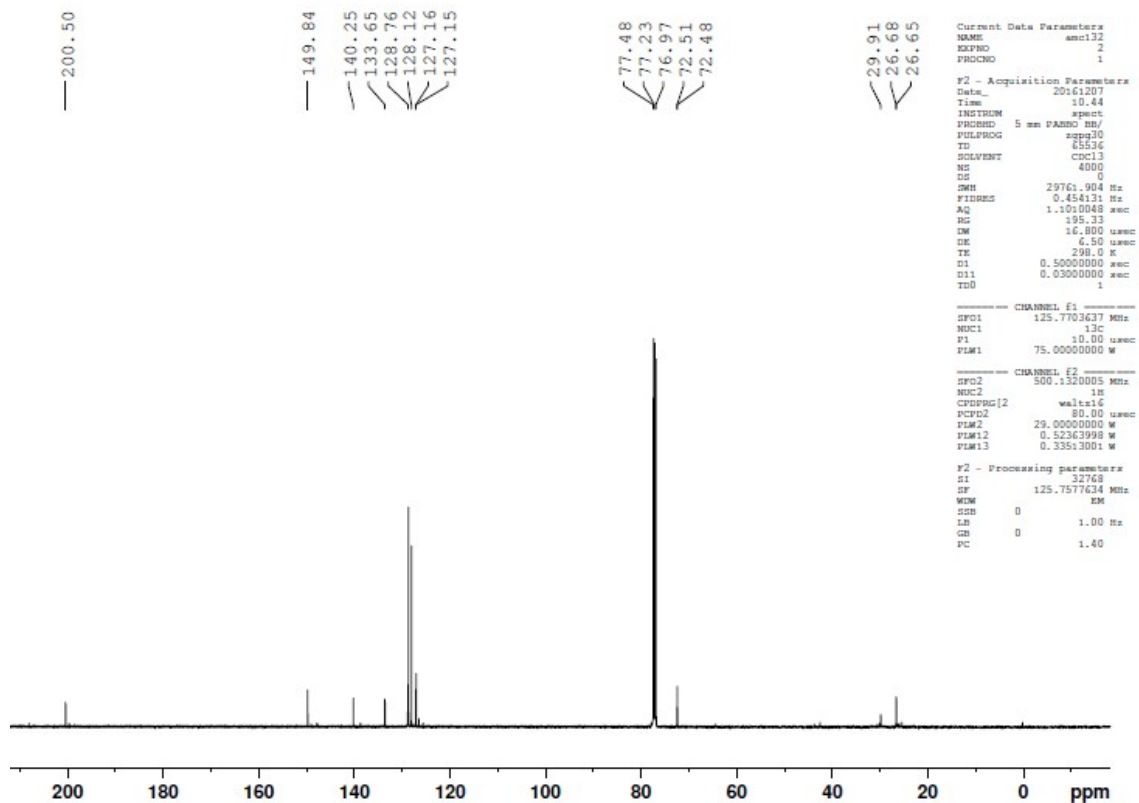

<sup>13</sup>C NMR of **8e** (125 MHz, CDCl<sub>3</sub>)

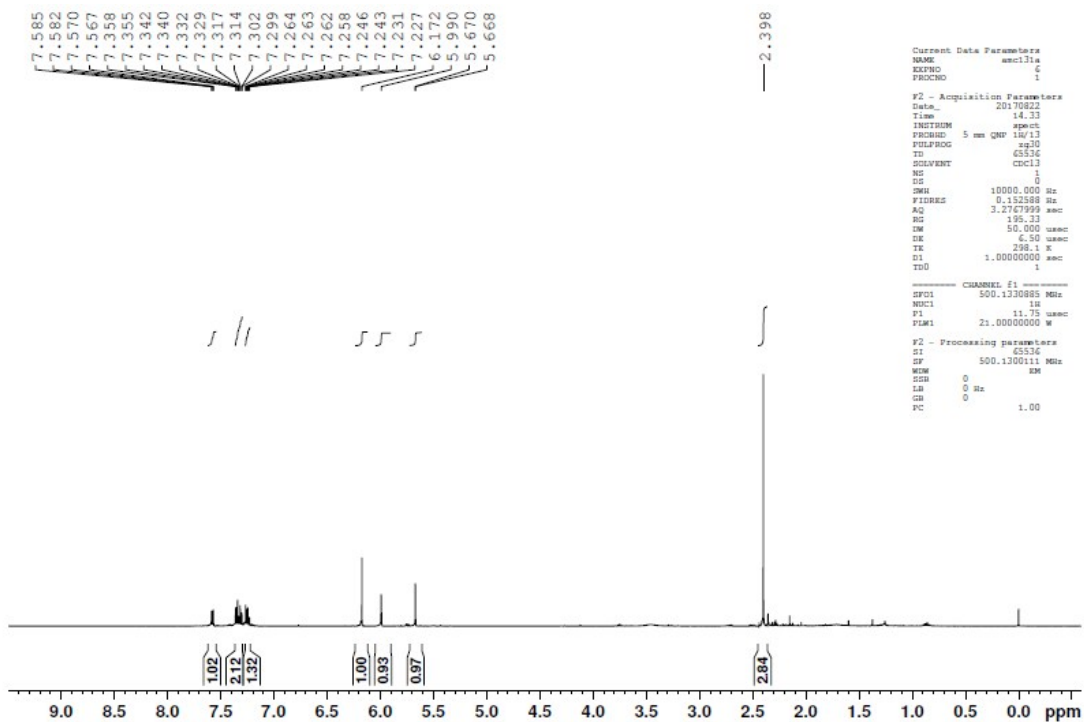

```

Current Data Parameters
NAME      amc13ia
EXPNO    4
PROCNO   1

F2 - Acquisition Parameters
Date_    20170422
Time     14.31
INSTRUM  spect
PROBHD   5 mm QNP 1H/13
PULPROG  zg30
TD        65536
SOLVENT  cdcl3
NS        1
DS        0
SWH       10000.000 Hz
FIDRES   0.132688 Hz
AQ        3.2767999 sec
RG        195.33
DM        50.000 usec
DE        6.50 usec
TE        298.1 K
D1        1.00000000 sec
TD0       1

===== CHANNEL F1 =====
SFO1     500.130065 MHz
NUC1     1H
P1        11.75 usec
PLM1     21.00000000 W

F2 - Processing parameters
SI        65536
SF        500.130011 MHz
WDW       EM
SSB       0
LB        0 Hz
GB        0
PC        1.00

```

<sup>1</sup>H NMR of **8f** (500 MHz, CDCl<sub>3</sub>)

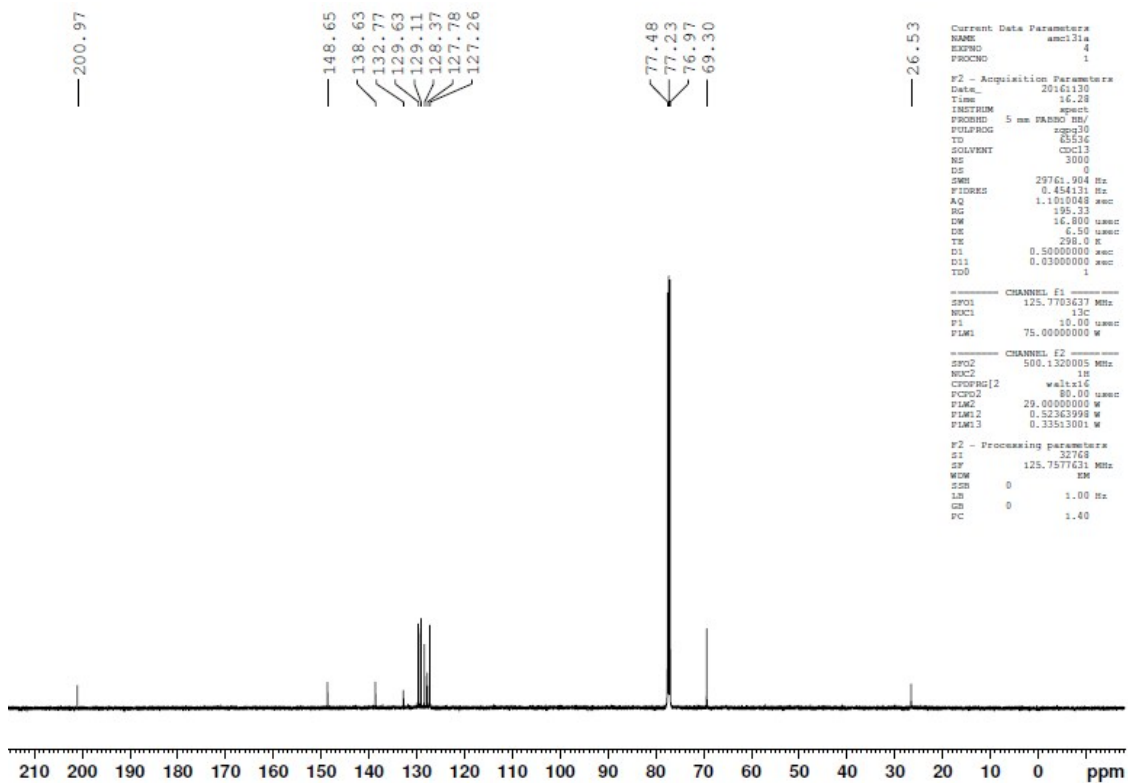

```

Current Data Parameters
NAME      amc13ia
EXPNO    4
PROCNO   1

F2 - Acquisition Parameters
Date_    20161130
Time     16.28
INSTRUM  spect
PROBHD   5 mm PABBO HD/
PULPROG  zgpg30
TD        65536
SOLVENT  cdcl3
NS        3000
DS        0
SWH       29761.904 Hz
FIDRES   0.454133 Hz
AQ        1.1010048 sec
RG        195.33
DM        16.800 usec
DE        6.50 usec
TE        298.0 K
D1        0.50000000 sec
D11      0.03000000 sec
TD0       1

===== CHANNEL F1 =====
SFO1     125.770367 MHz
NUC1     13C
P1        10.00 usec
PLM1     75.00000000 W

===== CHANNEL F2 =====
SFO2     500.132005 MHz
NUC2     1H
CPDPRG2  waltz16
PCPD2    80.00 usec
PLM2     29.00000000 W
PLM3     0.3236998 W
PLM13    0.33513001 W

F2 - Processing parameters
SI        32768
SF        125.7577631 MHz
WDW       EM
SSB       0
LB        1.00 Hz
GB        0
PC        1.40

```

<sup>13</sup>C NMR of **8f** (125 MHz, CDCl<sub>3</sub>)

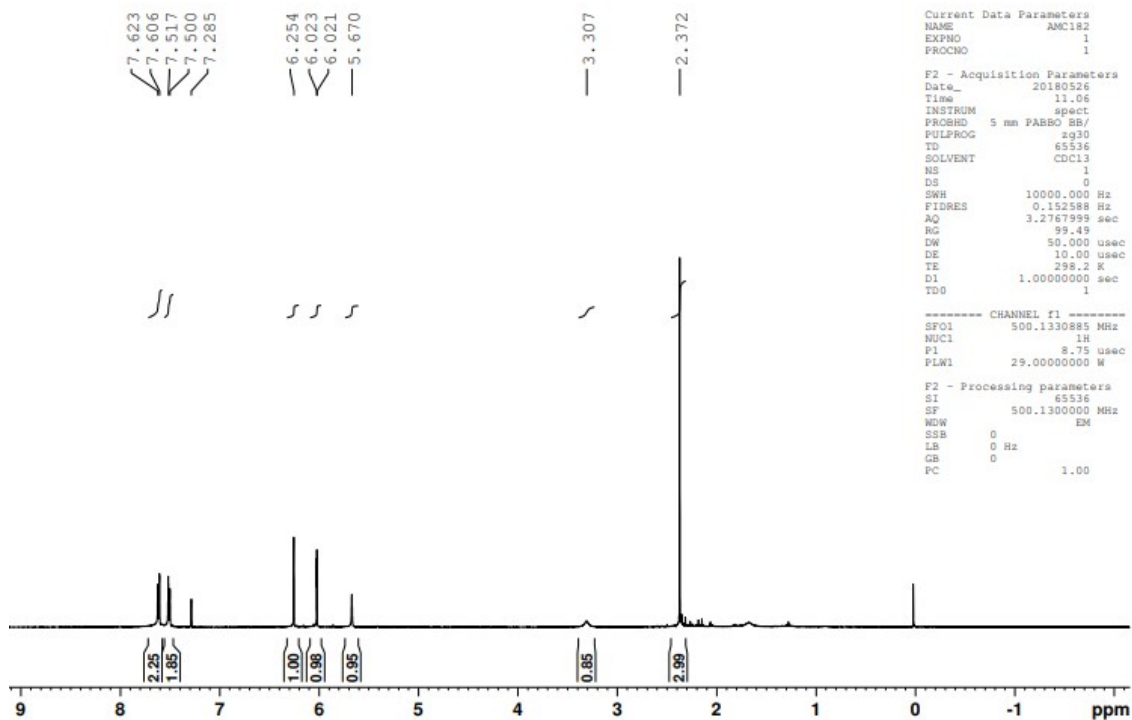

<sup>1</sup>H NMR of **8g** (500 MHz, CDCl<sub>3</sub>)

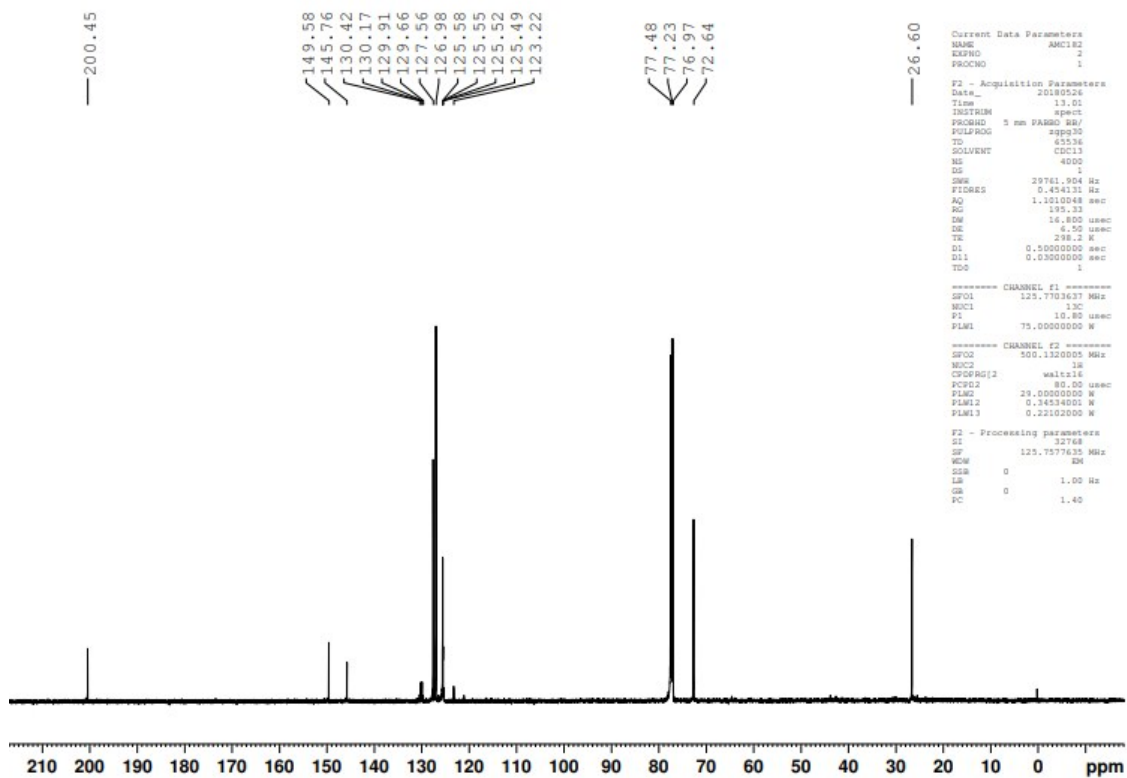

<sup>13</sup>C NMR of **8g** (125 MHz, CDCl<sub>3</sub>)

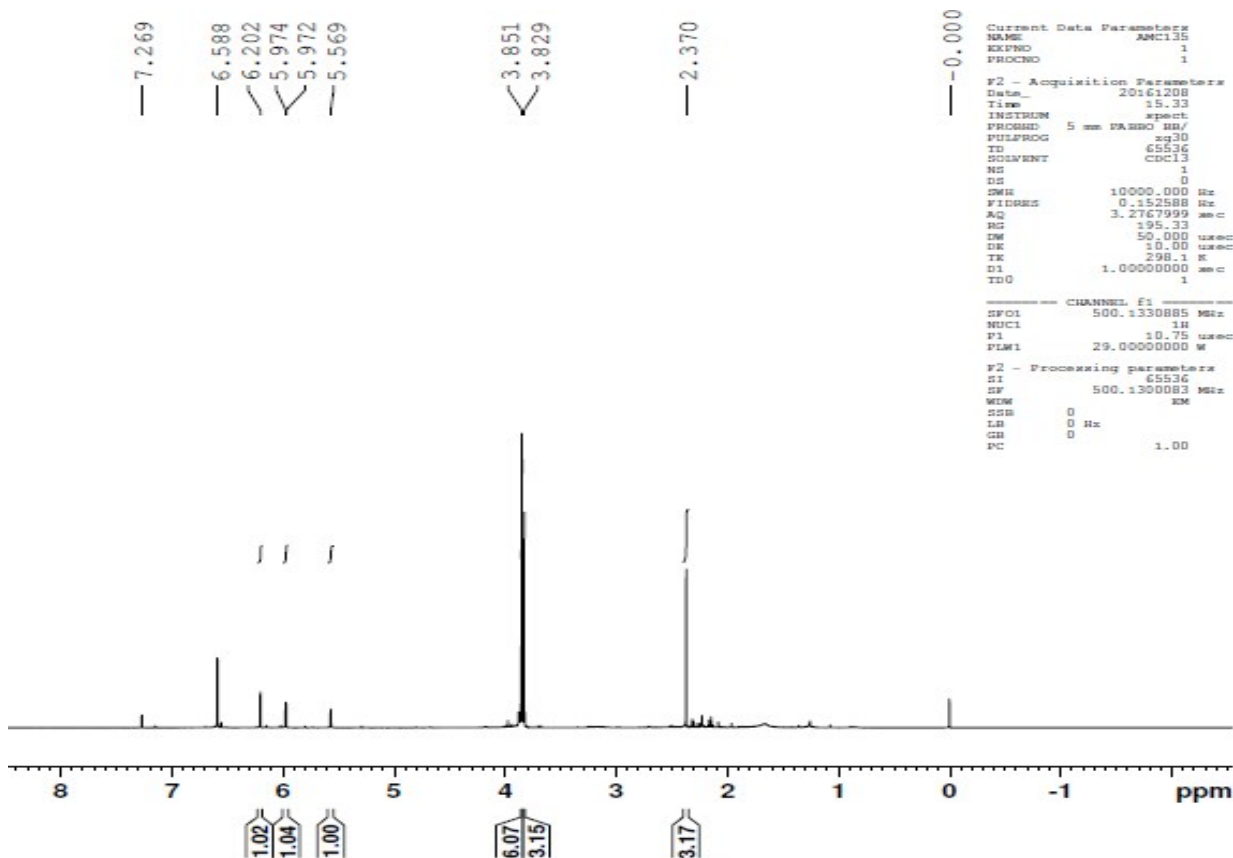

<sup>1</sup>H NMR of **8h** (500 MHz, CDCl<sub>3</sub>)

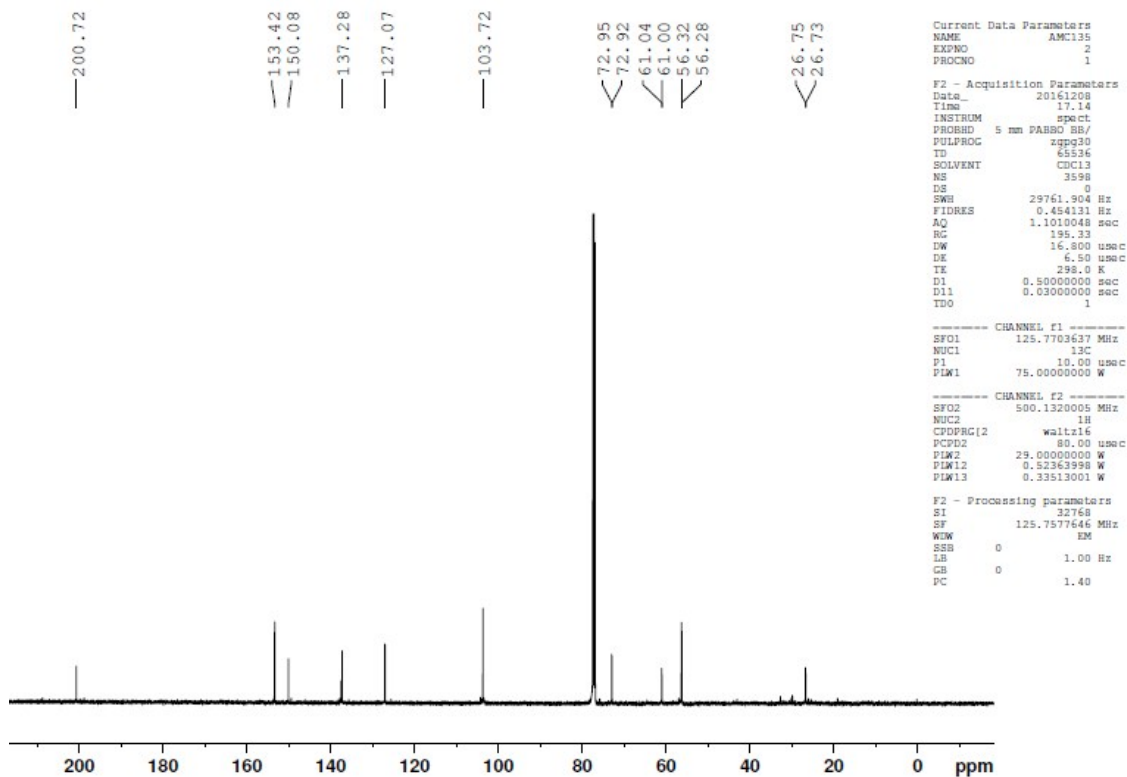

<sup>13</sup>C NMR of **8h** (125 MHz, CDCl<sub>3</sub>)

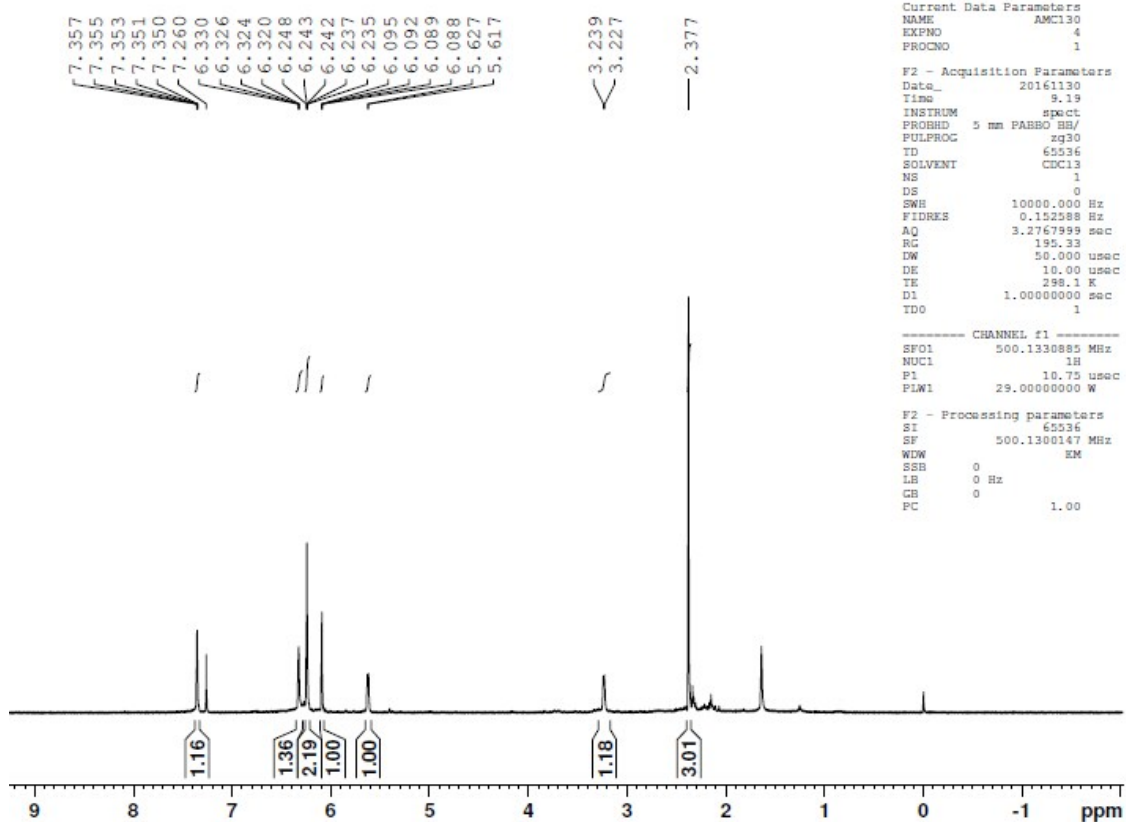

$^1\text{H}$  NMR of **8i** (500 MHz,  $\text{CDCl}_3$ )

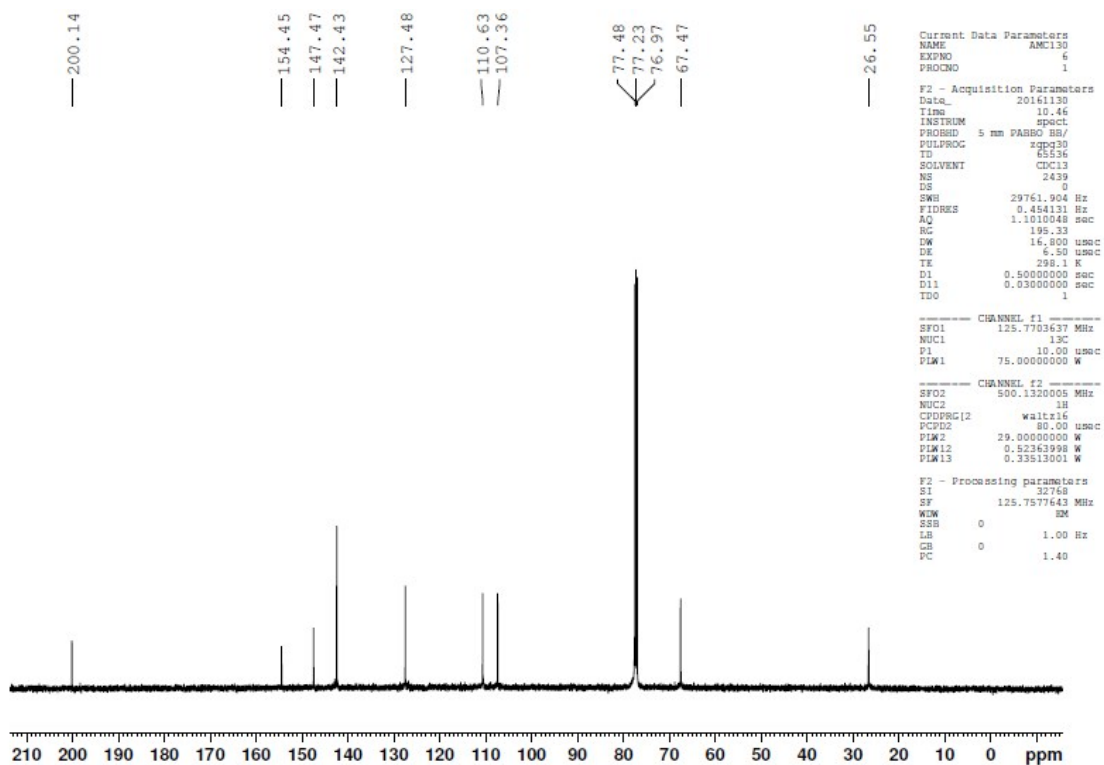

$^{13}\text{C}$  NMR of **8i** (125 MHz,  $\text{CDCl}_3$ )



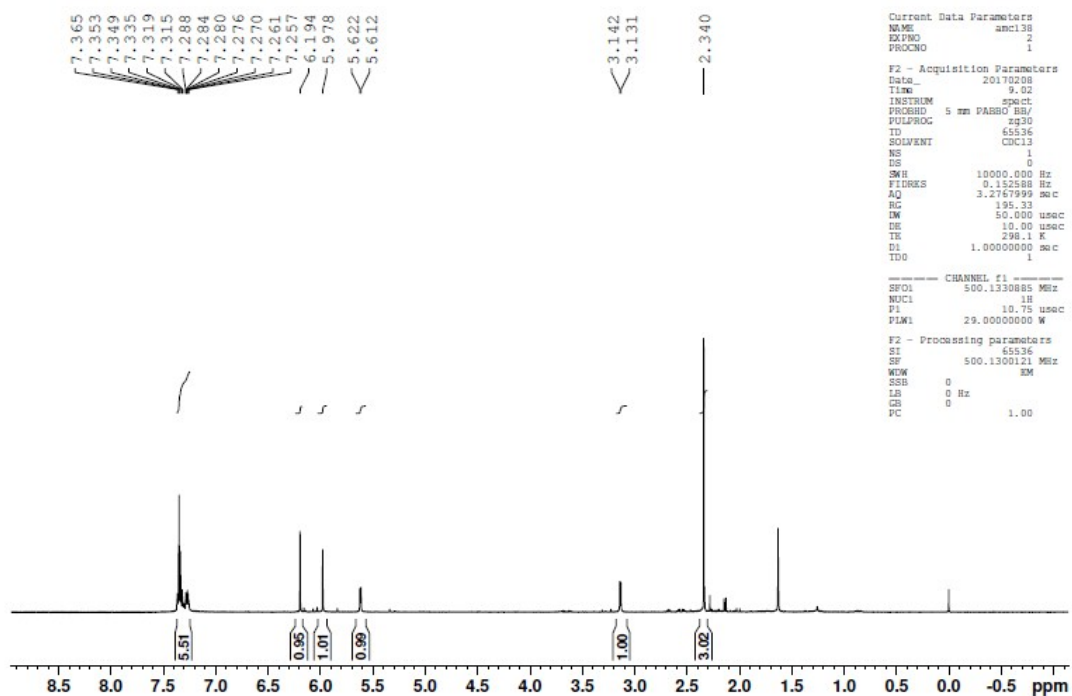

$^1\text{H}$  NMR of **8j** (500 MHz,  $\text{CDCl}_3$ )

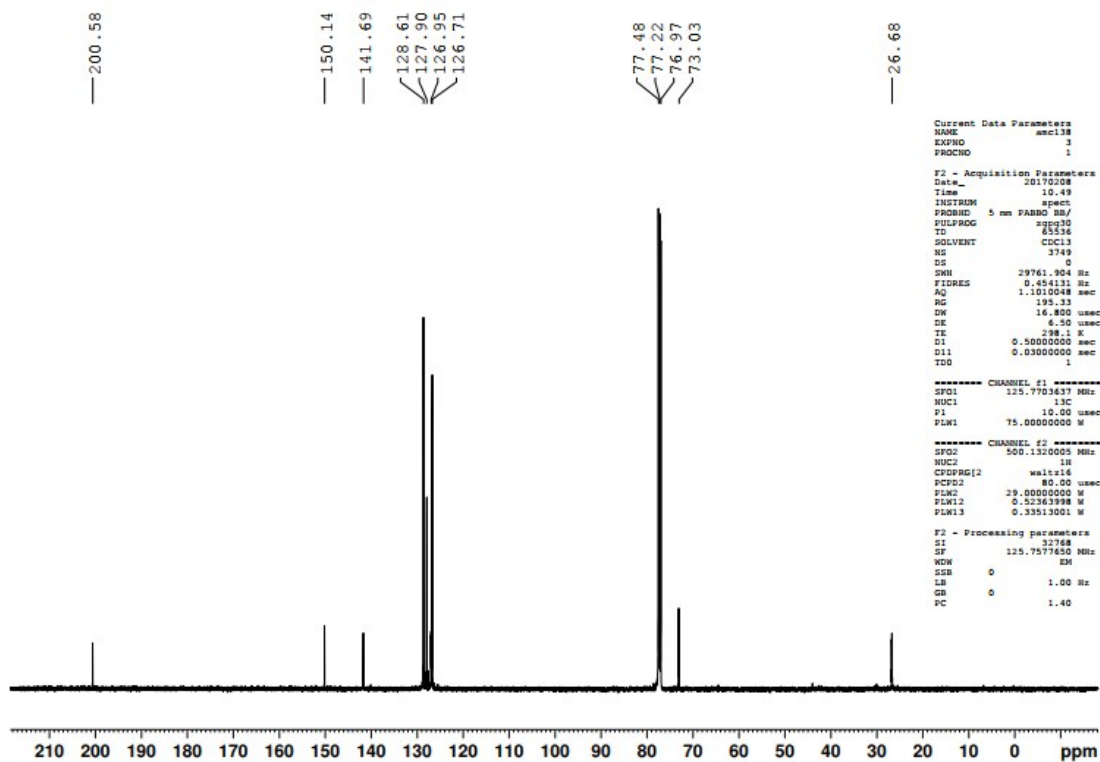

$^{13}\text{C}$  NMR of **8j** (125 MHz,  $\text{CDCl}_3$ )



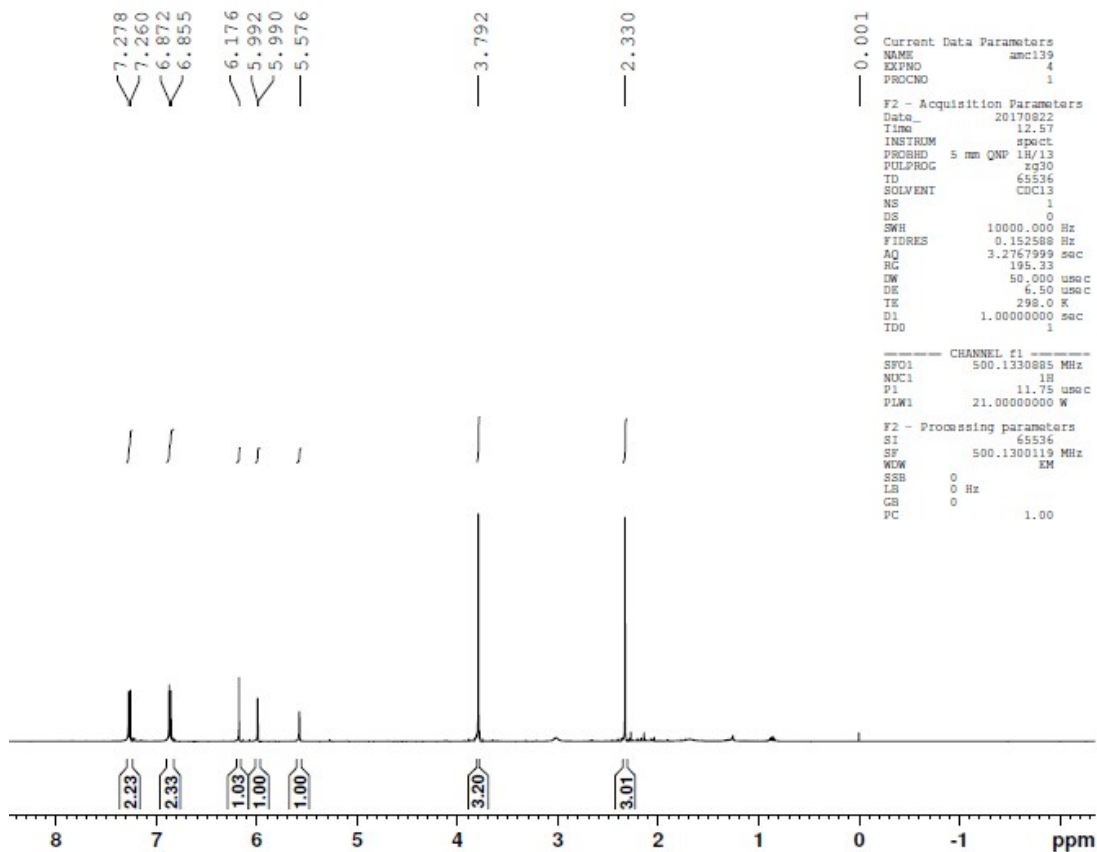

<sup>1</sup>H NMR of **8k** (500 MHz, CDCl<sub>3</sub>)

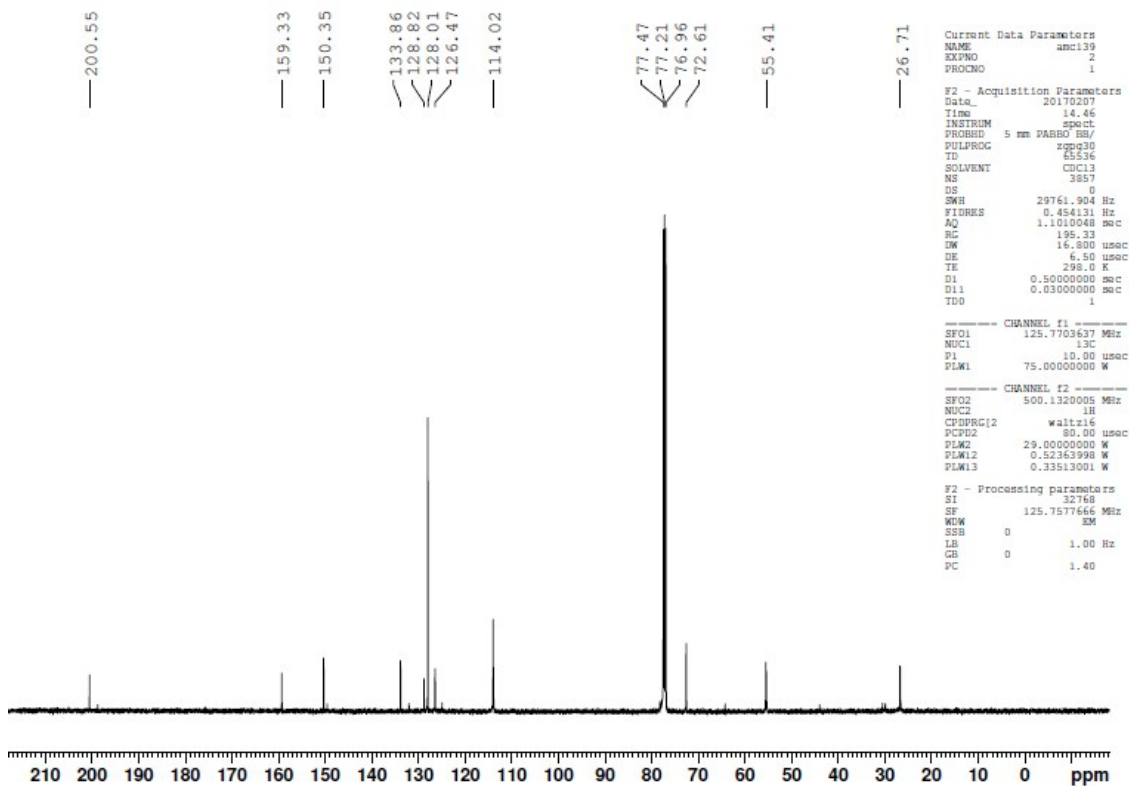

<sup>13</sup>C NMR of **8k** (125 MHz, CDCl<sub>3</sub>)

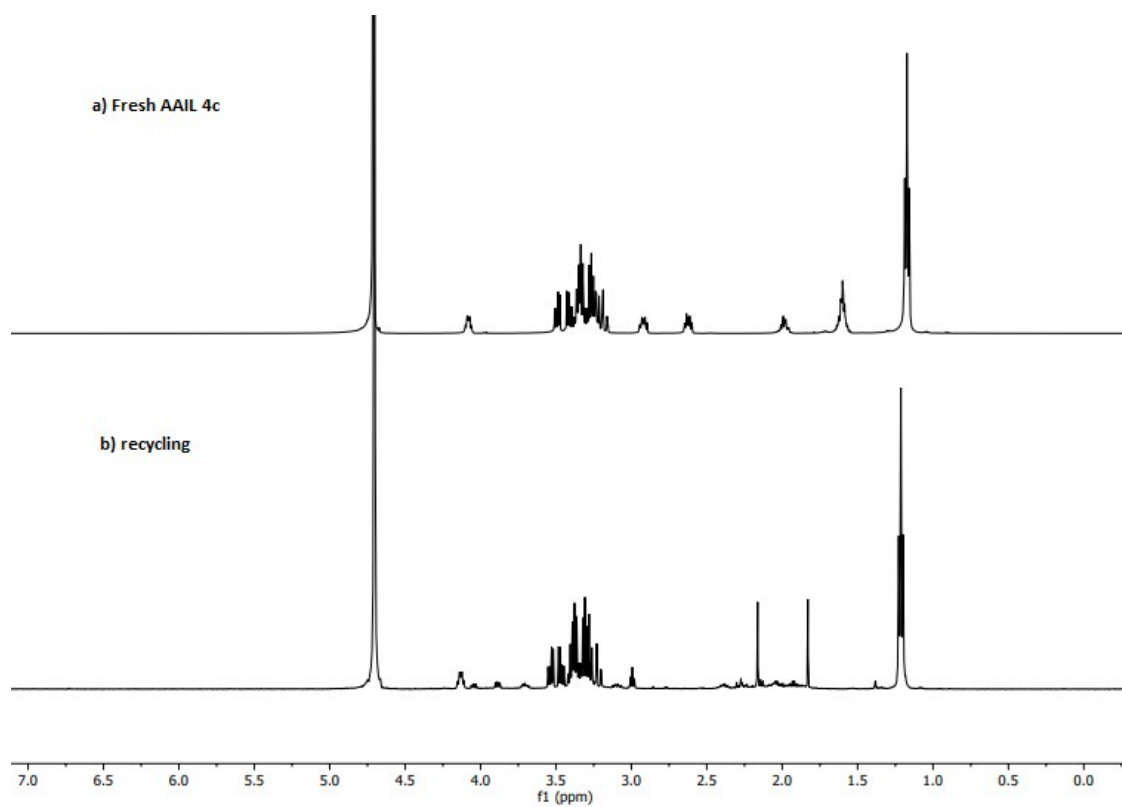

<sup>1</sup>H NMR of recycle AAIL **4c** (500 MHz, D<sub>2</sub>O): a) AAIL fresh before reaction; b) after the reaction.

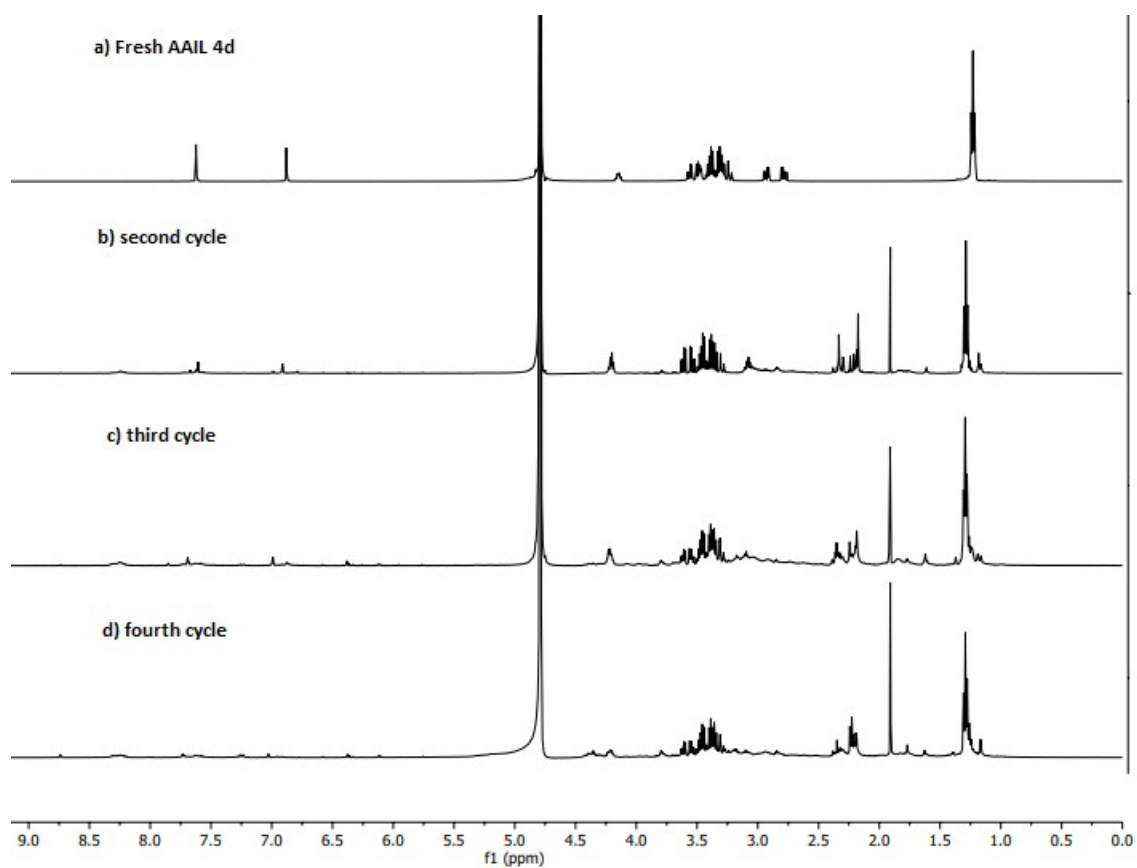

<sup>1</sup>H NMR of recycle AAIL **4d** (500 MHz, D<sub>2</sub>O): a) AAIL fresh before reaction; b) second cycle; c) third cycle; d) fourth cycle.

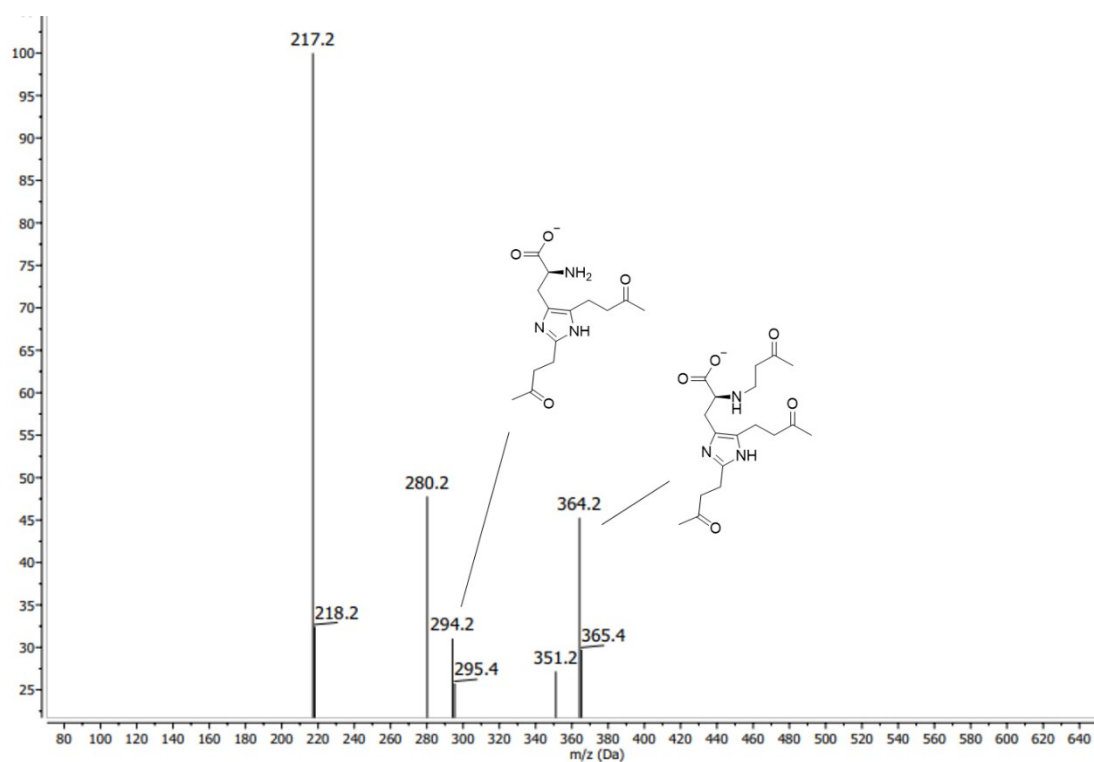

ESI(-)MS of the recycle AAIL **4d** after the MBH reaction.
